**Outcome reporting from protocols of clinical trials of Coronavirus Disease 2019  
(COVID-19): a review**

Ruijin Qiu,<sup>1</sup> Xuxu Wei,<sup>1</sup> Mengzhu Zhao,<sup>2</sup> Changming Zhong,<sup>1</sup> Chen Zhao,<sup>3</sup> Jiayuan Hu,<sup>1</sup>  
Min Li,<sup>4</sup> Ya Huang,<sup>1</sup> Songjie Han,<sup>1</sup> Tianmai He,<sup>1</sup> Jing Chen,<sup>5\*</sup> Hongcai Shang<sup>1\*</sup>

1. Key Laboratory of Chinese Internal Medicine of Ministry of Education and Beijing, Dongzhimen Hospital, Beijing University of Chinese Medicine.
2. First Teaching Hospital of Tianjin University of Traditional Chinese Medicine.
3. Institute of Basic Research In Clinical Medicine, China Academy of Chinese Medical Sciences
4. Beijing University of Chinese Medicine Third Affiliated Hospital
5. Baokang Affiliated Hospital of Tianjin University of Traditional Chinese Medicine, Tianjin China.

**\*Corresponding author:**

1. Jing Chen

Postal address: 88th Yuquan Road, Nankai District, Tianjin, China, 300193

Tel: +86 022 27474998

Email: [cjshcsyc@126.com](mailto:cjshcsyc@126.com)

2. Hongcai Shang

Postal address: Hai Yun Cang on the 5th Zip, Dongcheng District, Beijing, China, 100700.

Tel: +86 010 84012510

Email: [shanghongcai@foxmail.com](mailto:shanghongcai@foxmail.com)

**Word count:** 1864

## **Objectives**

To examine heterogeneity of outcomes in protocols of clinical trials of Coronavirus Disease 2019 (COVID-19) and to identify outcomes for prioritization in developing a core outcome set (COS) in this field.

## **Design**

This study is a review.

## **Data sources**

Databases of ICMJE-accepted clinical trial registry platform were searched on February 14, 2020.

## **Eligibility Criteria**

Randomized controlled trials (RCTs) and non-RCTs of COVID-19 were considered. Conditions of patients include common type, severe type or critical type. Interventions include traditional Chinese medicine (TCM) and Western medicine. We excluded trials that for discharged patients, psychological intervention and complications of COVID-19.

## **Data extraction and synthesis**

The general information and outcomes, outcome measurement instruments and measurement times were extracted. The results were analysed by descriptive analysis.

## **Results**

19 registry platforms were searched. A total of 97 protocols were included from 160 protocols. For protocols of TCM clinical trials, 76 outcomes from 16 outcome domains were reported, and almost half (34/76, 44.74%) of outcomes were reported only once; the most frequently reported outcome was time of SARS-CoV-2 RNA turns to negative. 27 (27/76, 35.53%) outcomes were provided one or more outcome measurement instruments. 10 outcomes were provided one or more measurement time frame. For protocols of western medicine clinical trials, 126 outcomes from 17 outcome domains were reported; almost half (62/126, 49.21%) of outcomes were reported only once; the most frequently reported outcome was proportion of patients with negative SARS-CoV-2. 27 outcomes were provided one or more outcome measurement instruments. 40 (40/126, 31.75%) outcomes were provided one or more measurement time frame.

## **Conclusion**

Outcome reporting in protocols of clinical trials of COVID-19 is inconsistent. Thus, developing a core outcome set is necessary.

**Keywords:** Outcomes; clinical trials, COVID-19; review.

**Strengths and limitations of this study**

1. This review is the first to describe variation in outcomes, outcome measurement instruments and outcome measurement time reporting in clinical trials for Coronavirus Disease 2019 (COVID-19).
2. All the database of ICMJE-accepted clinical trial registry platform were searched, and randomized controlled trials and observational studies were considered.
4. The aim of this review was to provide a list of outcomes for clinical trials of COVID-19, both interventions of Traditional Chinese Medicine and western medicine were considered.
5. When the searching was conducted, no clinical trials were registered by countries out of China, so all of included protocols were from China.

## **INTRODUCTION**

Since the severe acute respiratory syndrome coronavirus 2 (SARS-CoV-2) infection occurred in Wuhan, Hubei Province from December 2019, the disease, which was named as Coronavirus Disease 2019 (COVID-19) by World Health Organization (WHO) on February 12, 2020. According to the website of National Health Commission of the People's Republic of China (NHC-PRC), 77,658 confirmed cases have been reported from all areas of China until 0 o'clock, February 25, 2020. 27,323 cured patients discharged, 2,663 patients died [1]. On the website of WHO showed that 2559 confirmed cases have been reported in 33 countries out of China, 34 patients died at 10AM CET, February 25 2020 [2].

However, there is still no specific medicine for COVID-19 now. In China, the government encourages traditional Chinese medicine (herbal medicine, moxibustion, Baduanjin, etc.) to take an important role in clinical practice. The NHC-PRC and National Administration of Traditional Chinese Medicine (NATCM) have released the Version 6.0 of Diagnosis and Treatment Guideline for COVID-19 (informal version) on February 18, 2020 [3]. The guideline recommended general therapy methods, such as oxygen support, or trying to use alpha-interferon, Lopinavir/Ritonavir, Ribavirin, Chloroquine phosphate, Abidol, etc. For severe and critical type of disease, high flow nasal catheter oxygen therapy, invasive or non-invasive mechanical ventilation, extracorporeal membrane oxygenation (ECMO), plasma of survivors, glucocorticoid, plasma exchange or according to the patients' situation. The guideline also recommended TCM therapy methods, including herbal medicine formulas and proprietary Chinese medicine according to TCM syndromes, which are analyzed by clinical symptoms and signs through four methods of diagnosis: inspection, auscultation and olfaction, interrogation, and palpation.

At the same time, an increasing number of clinical trials are conducting. After searching some protocols of clinical trials from Chinese Clinical Trial Registry (ChiTCR) and ClinicalTrials.gov, we found that different researchers chose different outcomes. It is very important for clinical trials to provide evidence in treating COVID-19. However, the heterogeneity of outcomes make it impossible to conduct meta-analysis in the future, which may reduce the value of clinical trials and improve waste.

We are going to develop a core outcome set (COS) for clinical trials of COVID-19. The study have been registered in Core Outcome Measures in Effectiveness Trials (COMET) database [4]. The first clinical trial of COVID-19 was registered on January 23, 2020 [5]. When we registered the COS study, there were about 50 clinical trials registered [4]. On February 25, 2020, the number of registered trials increased to 297. Before we finish the COS, we believe that it is very important to draw researchers' attention to concern about outcomes in their research. So we conducted a review of outcome reporting from registered clinical trials of COVID-19. Because

TCM and western medicine take the same role in the treatment of COVID-19 in China, so the review includes both interventions.

## **METHODS**

### **Search strategy**

All the databases of ICMJE-accepted clinical trial registry platform [6] were considered. Search terms for ChiCTR included “COVID-19”, “2019-novel Corona Virus (2019-nCoV)”, “Novel Coronavirus Pneumonia (NCP)”, “Severe Acute Respiratory Infection (SARI)”, “Severe Acute Respiratory Syndrome - Corona Virus- 2 (SARS-CoV-2)”. Search terms for Netherlands National Trial Register (NTR) included “nCoV”, “Coronavirus”, “SARS”, “SARI”, “NCP”, “COVID”. Search terms for other databases included “2019-nCoV OR Novel Coronavirus OR New Coronavirus OR SARS-CoV-2 OR SARI OR NCP OR Novel Coronavirus Pneumonia OR COVID-19 OR Wuhan pneumonia”. The searching conducted on n February 14, 2020.

### **Inclusion criteria**

1. The population should include conformed patients of COVID-19.
2. Patients' conditions include common type, severe type or critical type.
3. The interventions include any type of TCM therapy or western therapy.
4. The study types include randomized controlled trial (RCT) and observation study.

### **Exclusion criteria**

1. Studies for discharged patients.
2. Studies for psychological intervention.
3. Studies for complications of COVID-19.

### **Study identification**

Two reviewers (RQ and XW) independently assessed all the registered protocols. Any disagreement was resolved by discussion.

### **Date extraction**

Two reviewers (RQ and MZ) independently extracted information. The information included the primary investigators' name, study type, type of disease, primary sponsor, number of settings, sample size, population's age, course of treatment, interventions, outcomes, outcome definition/measurement instruments, measurement time frame. Any disagreement was resolved by discussion.

### **Merging outcomes and grouping under outcome domains**

Two researchers (RQ and CZ) merged the overlapping outcomes according to the definition

of outcomes independently. If the researchers did not provide definition of outcome, they discussed and achieved consensus if necessary. For example, “PaO<sub>2</sub>/FiO<sub>2</sub>”, “oxygenation index”, “oxygen index”, “the difference of PaO<sub>2</sub>/FiO<sub>2</sub> between two groups” were aggregated as “PaO<sub>2</sub>/FiO<sub>2</sub>”. Many protocols presented composite outcomes. If definitions were provided, or all of the single outcomes in the composite one can be measured in one test, it was listed in the review. If a single outcome which belongs to a composite outcome was reported by one or more protocols, the composite outcome was removed from the review. But when we conduct Delphi survey in further research, the composite outcome will be list to consult the participants’ opinion.

After the original outcomes were aggregated, two researchers (RQ and CZ) grouped individual outcomes into the appropriate outcome domain together and achieved consensus. The taxonomy of outcome domains were developed by the researchers from COMET initiative [7].

### **Statistical analysis**

The results were analysed by descriptive analysis.

### **Patient and public involvement**

The COVID-19 is highly infectious. For the safety of patients and public, they were not involved in the design or planning of the study.

## **RESULTS**

### **Characteristics of literature**

In this review, a total of 160 protocols from 19 different clinical trials registry platforms were searched. After reading titles and study details, 63 non-relevant or ineligible study protocols were excluded. In the end, 97 eligible study protocols were included from ChiCTR and ClinicalTrials.gov. The searching results and inclusion numbers were shown in Table 1.

In the included protocols, 34 clinical trials were for TCM therapy and 63 clinical trials were for western medicine therapy. All of clinical trials will be conducted in China. These clinical trials include 75 RCTs (53 for western medicine and 22 for TCM medicine) and 22 non-RCTs (10 for western medicine and 12 for TCM medicine). The first registered clinical trial for western medicine was on January 23, 2020, while the first registered clinical trial for TCM medicine was on January 27, 2020. The general characteristics of the included protocols are shown in table 2 and table 3.

According to the information of primary sponsor, we found that the clinical trials were registered from 13 different provinces of China. Researchers from Hubei province registered more clinical trials (31/97, 31.96%) than researchers from other provinces. The distribution of clinical trials is

shown in Figure 1.

**Table 1 The global registry of COVID-19 related clinical trials searching results and inclusion**

| <b>ICMJE-accepted clinical trials registry</b>                  | <b>Results</b> | <b>Inclusion</b> | <b>Official website</b>                                                                                                             |
|-----------------------------------------------------------------|----------------|------------------|-------------------------------------------------------------------------------------------------------------------------------------|
| <b>WHO Primary Registries</b>                                   |                |                  |                                                                                                                                     |
| Australian New Zealand Clinical Trials Registry (ANZCTR)        | 0              | 0                | <a href="https://www.anzctr.org.au/">https://www.anzctr.org.au/</a>                                                                 |
| Brazilian Clinical Trials Registry (ReBec)                      | 0              | 0                | <a href="http://www.ensaiosclinicos.gov.br/">http://www.ensaiosclinicos.gov.br/</a>                                                 |
| Chinese Clinical Trial Registry (ChiCTR)                        | 111*           | 77               | <a href="http://www.chictr.org.cn/index.aspx">http://www.chictr.org.cn/index.aspx</a>                                               |
| Clinical Research Information Service (CRiS), Republic of Korea | 0              | 0                | <a href="http://cris.nih.go.kr/cris/en/use_guide/cris_introduce.jsp">http://cris.nih.go.kr/cris/en/use_guide/cris_introduce.jsp</a> |
| Clinical Trials Registry - India (CTRI)                         | 0              | 0                | <a href="http://ctri.nic.in/Clinicaltrials/login.php">http://ctri.nic.in/Clinicaltrials/login.php</a>                               |
| Cuban Public Registry of Clinical Trials (RPEEC)                | 0              | 0                | <a href="http://registroclinico.sld.cu/en/home">http://registroclinico.sld.cu/en/home</a>                                           |
| EU Clinical Trials Register (EU-CTR)                            | 0              | 0                | <a href="https://www.clinicaltrialsregister.eu/">https://www.clinicaltrialsregister.eu/</a>                                         |
| German Clinical Trials Register (DRKS)                          | 0              | 0                | <a href="https://www.drks.de/drks_web/">https://www.drks.de/drks_web/</a>                                                           |
| Iranian Registry of Clinical Trials (IRCT)                      | 0              | 0                | <a href="https://www.irct.ir/">https://www.irct.ir/</a>                                                                             |
| ISRCTN                                                          | 0              | 0                | <a href="http://www.isrctn.com/">http://www.isrctn.com/</a>                                                                         |
| Japan Primary Registries Network (JPRN)                         | 0              | 0                | <a href="https://rctportal.niph.go.jp/en/">https://rctportal.niph.go.jp/en/</a>                                                     |
| Lebanese Clinical Trials Registry (LBCTR)                       | 0              | 0                | <a href="http://lbctr.emro.who.int/">http://lbctr.emro.who.int/</a>                                                                 |
| Thai Clinical Trials Registry (TCTR)                            | 0              | 0                | <a href="http://www.clinicaltrials.in.th/">http://www.clinicaltrials.in.th/</a>                                                     |
| The Netherlands National Trial Register (NTR)                   | 24*            | 0                | <a href="https://www.trialregister.nl/">https://www.trialregister.nl/</a>                                                           |
| Pan African Clinical Trial Registry (PACTR)                     | 0              | 0                | <a href="https://pactr.samrc.ac.za/Search.aspx">https://pactr.samrc.ac.za/Search.aspx</a>                                           |
| Peruvian Clinical Trial Registry (REPEC)                        | 0              | 0                | <a href="https://ensayosclinicos-repec.ins.gob.pe/en/">https://ensayosclinicos-repec.ins.gob.pe/en/</a>                             |
| <b>Other Registries</b>                                         |                |                  |                                                                                                                                     |
| ClinicalTrials.gov                                              | 25*            | 20               | <a href="https://www.clinicaltrials.gov/">https://www.clinicaltrials.gov/</a>                                                       |
| UMIN Clinical Trials Registry (UMIN-CTR)                        | 0              | 0                | <a href="https://www.umin.ac.jp/ctr/index/htm/">https://www.umin.ac.jp/ctr/index/htm/</a>                                           |
| EudraCT                                                         | 0              | 0                | <a href="https://eudract.ema.europa.eu/index.html">https://eudract.ema.europa.eu/index.html</a>                                     |

**Table 2 The characteristics of included protocols for TCM clinical trials**

| Study ID     | Study type | Type of disease                                  | Primary sponsor           | Number of settings | Sample size | Population' age (years) | Intervention                                                                                                                                        | Number of outcomes                            |
|--------------|------------|--------------------------------------------------|---------------------------|--------------------|-------------|-------------------------|-----------------------------------------------------------------------------------------------------------------------------------------------------|-----------------------------------------------|
| Zhong N [8]  | Non RCT    | COVID-19                                         | Guangdong Province, China | 21                 | 400         | 18-75                   | Group 1: Xue-Bi-Jing injection<br>Group 2: CT                                                                                                       | Primary outcomes: 1<br>Secondary outcomes: 14 |
| Huang L [9]  | Non RCT    | COVID-19 (without severe type)                   | Beijing, China            | 1                  | 60          | ≥ 18                    | Group 1:TCM treatment<br>Group 2: TCM treatment and Lopinavir / Ritonavir<br>Group3: Lopinavir / Ritonavir;                                         | Primary outcomes: 1<br>Secondary outcomes: 8  |
| Liang T [10] | RCT        | COVID-19                                         | Beijing, China            | 1                  | 42          | ≥ 18                    | Group 1: TCM + CT<br>Group 2: CT                                                                                                                    | Primary outcomes: 1<br>Secondary outcomes: 3  |
| Liu Q [11]   | RCT        | severe and critical COVID-19                     | Beijing, China            | 1                  | 100         | Unclear                 | Group 1: Conventional medicine + TCM<br>Group 2:western medical therapies                                                                           | Primary outcomes: 4<br>Secondary outcomes: 7  |
| Xia W [12]   | OS         | COVID-19                                         | Hubei Province, China     | 1                  | 300         | Unclear                 | Group 1: according to guidelines                                                                                                                    | Primary outcomes: 1<br>Secondary outcomes: 0  |
| Wang Y [13]  | RCT        | Common type of COVID-19                          | Beijing, China            | 2                  | 120         | Unclear                 | Group 1: TCM standard decoctions + CT<br>Group 2: basic western medical therapies                                                                   | Primary outcomes: 2<br>Secondary outcomes: 6  |
| Li J [14]    | Non RCT    | COVID-19                                         | Henan Province, China     | 8                  | 100         | Unclear                 | Group 1: TCM syndrome differentiation treatment + CT<br>Group 2: CT                                                                                 | Primary outcomes: 2<br>Secondary outcomes: 8  |
| Zhong N [15] | RCT        | COVID-19                                         | Hebei Province, China     | 7                  | 400         | ≥ 18                    | Group 1: CT + low dose of Lianhua Qingwen<br>Group 2: CT + Lianhua Qingwen medium dose<br>Group 3: CT + high dose of Lianhua Qingwen<br>Group 4: CT | Primary outcomes: 1<br>Secondary outcomes: 6  |
| Yang Z [16]  | OS         | COVID-19                                         | Guangdong Province, China | 1                  | 72          | 18-75                   | Group 1: Tanreqing injection                                                                                                                        | Primary outcomes: 2<br>Secondary outcomes: 8  |
| Zhang J [17] | RCT        | COVID-19 (virus turned negative after treatment) | Hubei Province, China     | 1                  | 100         | 18-70                   | Group 1: TCM decoctions+basic western medical therapies<br>Group 2: CT                                                                              | Primary outcomes: 3<br>Secondary outcomes: 1  |



| Study ID   | Study type | Type of disease                                  | Primary sponsor          | Number of settings | Sample size | Population' age (years) | Intervention                                                                                                 | Number of outcomes                            |
|------------|------------|--------------------------------------------------|--------------------------|--------------------|-------------|-------------------------|--------------------------------------------------------------------------------------------------------------|-----------------------------------------------|
| Zheng [18] | C RCT      | COVID-19 (virus turned negative after treatment) | Hubei Province, China    | 1                  | 100         | 18-70                   | Group 1: shadowboxing + CT<br>Group 2: CT                                                                    | Primary outcomes: 4<br>Secondary outcomes: 1  |
| Xia W [19] | RCT        | COVID-19 (virus turned negative after treatment) | Hubei Province, China    | 1                  | 100         | 18-70                   | Group 1: Pulmonary rehabilitation+ CT<br>Group 2: CT                                                         | Primary outcomes: 2<br>Secondary outcomes: 3  |
| Xia W [20] | RCT        | Common type of COVID-19                          | Hubei Province, China    | 1                  | 100         | 18-70                   | Group 1: TCM decoctions+ CT<br>Group 2: CT                                                                   | Primary outcomes: 3<br>Secondary outcomes: 5  |
| Wen C [21] | RCT        | common or severe type of COVID-19                | Zhejiang Province, China | 1                  | 140         | 14-80                   | Group 1 (ordinary): CT<br>Group 2 (ordinary): TCM + CT<br>Group 3 (severe): CT<br>Group 4 (severe): TCM + CT | Primary outcomes: 3<br>Secondary outcomes: 6  |
| Xie C [22] | RCT        | Suspected and confirmed diagnosis of COVID-19    | Sichuan Province, China  | 1                  | 400         | Unclear                 | Group 1: TCM treatment + CT<br>Group 2: CT                                                                   | Primary outcomes: 4<br>Secondary outcomes: 0  |
| Xie C [23] | OS         | suspected and confirmed diagnosis of COVID-19    | Sichuan Province, China  | 1                  | 200         | Unclear                 | Group 1: TCM treatment + CT                                                                                  | Primary outcomes: 13<br>Secondary outcomes: 0 |
| Wen C [24] | OS         | COVID-19                                         | Zhejiang Province, China | 1                  | 1000        | Unclear                 | Group 1: Integrated Traditional Chinese and Western Medicine                                                 | Primary outcomes: 4<br>Secondary outcomes: 5  |
| Liu Q [25] | Non-RCT    | Common type of COVID-19                          | Beijing, China           | 5                  | 60          | ≥ 18                    | Group 1: Reduning injection + CT<br>Group 2: CT                                                              | Primary outcomes: 1<br>Secondary outcomes: 5  |

| Study ID    | Study type | Type of disease                 | Primary sponsor           | Number of settings | Sample size | Population' age (years) | Intervention                                                                                                                                                                                                                                                                                                                                       | Number of outcomes                                                |
|-------------|------------|---------------------------------|---------------------------|--------------------|-------------|-------------------------|----------------------------------------------------------------------------------------------------------------------------------------------------------------------------------------------------------------------------------------------------------------------------------------------------------------------------------------------------|-------------------------------------------------------------------|
| Wang [26]   | D RCT      | COVID-19                        | Hubei Province, China     | 2                  | 400         | ≥ 18                    | Group 1: Low dose of Shuanghuanglian + CT<br>Group 2: Medium dose of Shuanghuanglian + CT<br>Group 3: High dose of Shuanghuanglian + CT<br>Group 4: CT                                                                                                                                                                                             | Primary outcomes: 1<br>Secondary outcomes: 6                      |
| Zhang [27]  | Z OS       | COVID-19                        | Guangdong Province, China | 1                  | 100         | Unclear                 | Group 1: Xinguan-1 formula + CT<br>Group 2: CT                                                                                                                                                                                                                                                                                                     | Primary outcomes: 2<br>Secondary outcomes: 10                     |
| Xiao X [28] | RCT        | COVID-19                        | Beijing, China            | 1                  | 150         | 14-80                   | Group 1: TCM + CT<br>Group 2: CT                                                                                                                                                                                                                                                                                                                   | Primary outcomes: 1<br>Secondary outcomes: 5<br>Other outcomes: 4 |
| Zhang [29]  | N RCT      | COVID-19                        | Anhui Province, China     | 4                  | 200         | 12-80                   | Group 1: TCM<br>Group 2: CT                                                                                                                                                                                                                                                                                                                        | Primary outcomes: 4<br>Secondary outcomes: 0                      |
| Mao W [30]  | OS         | suspected or confirmed COVID-19 | Zhejiang Province, China  | 9                  | 350         | 18-85                   | Group 1 (Suspected patients): Routine respiratory disease treatment<br>Group 2 (Suspected patients): TCM + control group<br>Group 3 (Common COVID-19 patients): treatment according to the guideline<br>Group 4 (Common COVID-19 patients): TCM + control group<br>Group 5 (Severe COVID-19 patients) : TCM + treatment according to the guideline | Primary outcomes: 6<br>Secondary outcomes: 4                      |
| Liu D [31]  | RCT        | COVID-19                        | Hubei Province, China     | 1                  | 120         | ≥ 18                    | Group 1: Jinyebaidu granule + CT<br>Group 2: CT                                                                                                                                                                                                                                                                                                    | Primary outcomes: 1<br>Secondary outcomes: 1                      |
| Huang [32]  | L RCT      | Common type of COVID-19         | Beijing, China            | 1                  | 408         | 18-75                   | Group 1: TCM + CT<br>Group 2: CT                                                                                                                                                                                                                                                                                                                   | Primary outcomes: 1<br>Secondary outcomes: 7                      |
| Lv D [33]   | RCT        | Severe type of COVID-19         | Zhejiang Province, China  | 1                  | 40          | 18-80                   | Group 1: Babaodan + CT<br>Group 2: CT                                                                                                                                                                                                                                                                                                              | Primary outcomes: 2<br>Secondary outcomes: 0                      |

| Study ID    | Study type | Type of disease                  | Primary sponsor       | Number of settings | Sample size | Population' age (years) | Intervention                                                                                                                                           | Number of outcomes                           |
|-------------|------------|----------------------------------|-----------------------|--------------------|-------------|-------------------------|--------------------------------------------------------------------------------------------------------------------------------------------------------|----------------------------------------------|
| Huang [34]  | T RCT      | Severe type of COVID-19          | Hubei Province, China | 3                  | 160         | 18-80                   | Group 1: Truncation and Torsion Formula + CT<br>Group 2: CT                                                                                            | Primary outcomes: 2<br>Secondary outcomes: 7 |
| Zhang [35]  | W Non-RCT  | COVID-19                         | Shanghai, China       | 1                  | 600         | 15-85                   | Group 1: herbal medicine based on TCM syndrome + CT<br>Group 2: Qing-Fei-Pai-Du decoction + CT<br>Group 3: Shu-Feng-Jie-Du capsule + CT<br>Group 4: CT | Primary outcomes: 2<br>Secondary outcomes: 6 |
| Zheng [36]  | X RCT      | COVID-19                         | Hubei Province, China | 6                  | 160         | ≥ 18                    | Group 1: Shenqi Fuzheng Injection + CT<br>Group 2: CT                                                                                                  | Primary outcomes: 1<br>Secondary outcomes: 3 |
| Zheng [37]  | X RCT      | COVID-19                         | Hubei Province, China | 5                  | 160         | ≥ 18                    | Group 1: Kangbingdu granules + CT<br>Group 2: CT                                                                                                       | Primary outcomes: 1<br>Secondary outcomes: 0 |
| Zhang [38]  | Y RCT      | COVID-19                         | Beijing, China        | 1                  | 60          | 18-80                   | Group 1: CT<br>Group 2: TCM syndrome differentiation treatment + CT                                                                                    | Primary outcomes: 4<br>Secondary outcomes: 0 |
| Wang L [39] | RCT        | COVID-19                         | Shanghai, China       | 1                  | 120         | 18-81                   | Group 1: CT<br>Group 2: TCM + CT                                                                                                                       | Primary outcomes: 1<br>Secondary outcomes: 4 |
| Lu H [40]   | RCT        | Mild and common type of COVID-19 | Shanghai, China       | 1                  | 72          | 18-75                   | Group 1: Tanreqing Capsules + CT<br>Group 2: CT                                                                                                        | Primary outcomes: 2<br>Secondary outcomes: 5 |
| Zhai X [41] | Non-RCT    | COVID-19                         | Shanghai, China       | 1                  | 30          | 0-18                    | Group 1: CT<br>Group 2: TCM + CT                                                                                                                       | Primary outcomes: 4<br>Secondary outcomes: 1 |

CT: conventional therapy (including any western routine treatment); OS: observational study; RCT: randomized controlled trial; TCM: traditional Chinese medicine

**Table 3 The characteristics of included protocols for western medicine clinical trials**

| Study ID   | Study type | Type of disease                         | Primary sponsor           | Number of settings | Sample size | Population' age (years) | Course of treatment | Intervention                                                                                                                                                                                           | Number of outcomes                                                |
|------------|------------|-----------------------------------------|---------------------------|--------------------|-------------|-------------------------|---------------------|--------------------------------------------------------------------------------------------------------------------------------------------------------------------------------------------------------|-------------------------------------------------------------------|
| Huang [5]  | C RCT      | Unexplained viral pneumonia or COVID-19 | Hubei province, China     | 1                  | 160         | ≥18                     |                     | Group: Lopinavir-ritonavir tablets + interferon-α2b<br>Group 2: CT                                                                                                                                     | Primary outcomes: 2<br>Secondary outcomes: 9                      |
| Chen [42]  | Y RCT      | COVID-19                                | Chongqing, China          | 1                  | 40          | ≥18                     |                     | Group 1: Lopinavir-ritonavir tablets + Aerosolized interferon-α + Methylprednisolone<br>Group 2: Lopinavir-ritonavir tablets + Aerosolized interferon-α                                                | Primary outcomes: 3<br>Secondary outcomes: 3                      |
| Zhao [43]  | D RCT      | COVID-19                                | Liaoning Province, China  | 2                  | 45          | ≥18                     | Unclear             | Group 1: Critical Treatment in Critical Period + Ankylosaurus<br>Group2: Critical Treatment in Critical Period + Ankylosaurus+M1 suppression therapy<br>Group 3: Critical Treatment in Critical Period | Primary outcomes: 2<br>Secondary outcomes: 0                      |
| Jiang [44] | H Non-RC T | COVID-19                                | Sichuan Province, China   | 2                  | 120         | 18-80                   | Unclear             | Group 1: Lopinavir/litonavir (LPV/r)+ emtricitabine (FTC)/ Tenofovir alafenamide Fumarate tablets (TAF)<br>Group 2: LPV/r                                                                              | Primary outcomes: 1<br>Secondary outcomes: 3                      |
| Jiang [45] | S Non-RC T | COVID-19                                | Guangdong Province, China | 1                  | 20          | ≥18                     | Unclear             | Group 1: chloroquine<br>Group 2:CT                                                                                                                                                                     | Primary outcomes: 2<br>Secondary outcomes: 5<br>Other outcomes: 4 |
| Wang [46]  | X RCT      | COVID-19                                | Hubei province, China     | 1                  | 100         | 18-65                   | 14 days             | Group 1: Darunavir/cobicistat + thymosin α1 + CT<br>Group 2: LPV/r + hymosin α1+ CT<br>Group 3: hymosin α1                                                                                             | Primary outcomes: 1<br>Secondary outcomes: 8                      |
| Zhao [47]  | J RCT      | Mild COVID-19                           | Hubei province, China     | 1                  | 328         | ≥18                     | Unclear             | Group 1: Lopinavir-Ritonavir + CT<br>Group 2: CT                                                                                                                                                       | Primary outcomes: 1<br>Secondary outcomes: 8                      |
| Gong [48]  | G RCT      | Mild and severe COVID-19                | Hunan province, China     | 6                  | 240         | 18-70                   | 7-14 days           | Group 1: Novaferon Atomization inhalation + CT<br>Group 2: lopinavir / ritonavir tablets (Kaletra) + CT<br>Group 3: Novafron + Kaletra + CT<br>Group 4: CT                                             | Primary outcomes: 1<br>Secondary outcomes: 3                      |

| Study ID   | Study type | Type of disease                                   | Primary sponsor          | Number of settings | Sample size | Population' age (years) | Course of treatment | Intervention                                                                                                                                                                                                                                                                                                  | Number of outcomes                           |
|------------|------------|---------------------------------------------------|--------------------------|--------------------|-------------|-------------------------|---------------------|---------------------------------------------------------------------------------------------------------------------------------------------------------------------------------------------------------------------------------------------------------------------------------------------------------------|----------------------------------------------|
| Qiu [49]   | Y RCT      | COVID-19                                          | Zhejiang Province, China | 1                  | 30          | 18-75                   | ≤14 days            | Group 1: Baloxavir Marboxil<br>Group 2: Favipiravir<br>Group 3: Lopinavir-Ritonavir                                                                                                                                                                                                                           | Primary outcomes: 2<br>Secondary outcomes: 8 |
| Zhang [50] | Z RCT      | COVID-19                                          | Hubei province, China    | 1                  | 300         | 30-65                   | Unclear             | Group 1: Low dose of Hydroxychloroquine<br>Group 2: High dose of Hydroxychloroquine<br>Group 3: Placebo                                                                                                                                                                                                       | Primary outcomes: 1<br>Secondary outcomes: 1 |
| Lv Q [51]  | RCT        | COVID-19                                          | Zhejiang Province, China | 1                  | 600         | 18-65                   | Unclear             | Group 1: Arbidol Tablets<br>Group 2: Novaferon injection, atomized inhalation + Arbidol Tablets<br>Group 3: Lopinavir/litonavir<br>Group 4: Arbidol Tablets<br>Group 5: Novaferon injection, atomized inhalation + Lopinavir/litonavir<br>Group 6: Novaferon injection, atomized inhalation + Arbidol Tablets | Primary outcomes: 1<br>Secondary outcomes: 0 |
| Zhou [52]  | J RCT      | Severe type of COVID-19                           | Hubei province, China    | 1                  | 70          | 18-75                   | Unclear             | Group 1: Ruxolitinib combined with mesenchymal stem cell<br>Group 2: CT                                                                                                                                                                                                                                       | Primary outcomes: 1<br>Secondary outcomes: 0 |
| Qiu [53]   | Y RCT      | COVID-19 (Severe and critical types are excluded) | Zhejiang Province, China | 5                  | 160         | 18-75                   | Unclear             | Group 1: ASC09/Ritonavir + CT<br>Group 2: Lopinavir/Ritonavir + CT                                                                                                                                                                                                                                            | Primary outcomes: 1<br>Secondary outcomes: 9 |
| Liu [54]   | Y Non-RC T | COVID-19                                          | Shenzhen Province, China | 1                  | 90          | 16-75                   | Unclear             | Group 1: alpha-Interferon atomization<br>Group 2: Lopinavir and Ritonavir + alpha-Interferon atomization<br>Group 3: Favipiravir + alpha-Interferon atomization                                                                                                                                               | Primary outcomes: 5<br>Secondary outcomes: 0 |
| Chen [55]  | Y RCT      | Mild type of COVID-19                             | Chongqing, China         | 1                  | 108         | 18-65                   | Unclear             | Group 1: Ribavirin + Interferon alpha-1b<br>Group 2: lopinavir / ritonavir + interferon alpha-1b<br>Group 3: Ribavirin + LPV/r+Interferon alpha-1b                                                                                                                                                            | Primary outcomes: 1<br>Secondary outcomes: 5 |

| Study ID  | Study type | Type of disease                      | Primary sponsor           | Number of settings | Sample size | Population' age (years) | Course of treatment | Intervention                                                                                                                                                                                                                                                                    | Number of outcomes                           |
|-----------|------------|--------------------------------------|---------------------------|--------------------|-------------|-------------------------|---------------------|---------------------------------------------------------------------------------------------------------------------------------------------------------------------------------------------------------------------------------------------------------------------------------|----------------------------------------------|
| Shan [56] | H OS       | COVID-19                             | Guangdong Province, China | 2                  | 205         | ≥18                     | Unclear             | Group 1: mild-moderate chloroquine<br>Group 2: mild-moderate Lopinavir/ritonavir<br>Group 3: mild-moderate combination group (chloroquine phosphate + Lopinavir/ritonavir)<br>Group 4: severe-chloroquine Group<br>5: severe- Lopinavir/ritonavir                               | Primary outcomes: 1<br>Secondary outcomes: 4 |
| Pei [57]  | B RCT      | Severe and critical type of COVID-19 | Hubei province, China     | 1                  | 30          | ≥18                     | Unclear             | Group 1: CT<br>Group 2: umbilical cord blood mononuclear cells + CT                                                                                                                                                                                                             | Primary outcomes: 1<br>Secondary outcomes: 8 |
| Pei [58]  | B RCT      | Severe and critical type of COVID-19 | Hubei province, China     | 1                  | 30          | ≥18                     | Unclear             | Group 1: CT<br>Group 2: umbilical cord mesenchymal stem cell conditioned medium + CT                                                                                                                                                                                            | Primary outcomes: 1<br>Secondary outcomes: 8 |
| Qiu [59]  | Y RCT      | COVID-19                             | Zhejiang Province, China  | 1                  | 30          | 18-75                   | Unclear             | Group 1: current antiviral treatment + Baloxavir Marboxil tablets<br>Group 2: current antiviral treatment + fabiravir tablets<br>Group 3: current antiviral treatment                                                                                                           | Primary outcomes: 2<br>Secondary outcomes: 6 |
| Hu [60]   | B OS       | Common or severe type of COVID-19    | Hubei province, China     | 1                  | 40          | ≥18                     | Unclear             | Group 1: vMIP atomized inhalation + CT                                                                                                                                                                                                                                          | Primary outcomes: 2<br>Secondary outcomes: 2 |
| Liu [61]  | L RCT      | COVID-19                             | Sichuan Province, China   | 8                  | 60          | 18-75                   | Unclear             | Group 1: nebulization of novel gene recombinant super compound interferon<br>Group 2: nebulization of alpha-interferon                                                                                                                                                          | Primary outcomes: 9<br>Secondary outcomes: 6 |
| Li L [62] | RCT        | COVID-19                             | Zhejiang Province, China  | 1                  | 63          | 1-99                    | Unclear             | Group 1a: CT + Intravenous infusion of Human Menstrual Blood-derived Stem Cells preparations<br>Group 1b: CT<br>Group 2a: Artificial liver therapy + CT<br>Group 2b: Artificial liver therapy + Intravenous infusion of Human Menstrual Blood-derived Stem Cells preparations + | Primary outcomes: 1<br>Secondary outcomes: 8 |

| Study ID          | Study type | Type of disease             | Primary sponsor           | Number of settings | Sample size | Population' age (years)   | Course of treatment | Intervention                                                                                                                                                                                                                                | Number of outcomes                           |
|-------------------|------------|-----------------------------|---------------------------|--------------------|-------------|---------------------------|---------------------|---------------------------------------------------------------------------------------------------------------------------------------------------------------------------------------------------------------------------------------------|----------------------------------------------|
|                   |            |                             |                           |                    |             |                           |                     | CT                                                                                                                                                                                                                                          |                                              |
| Wu [63]           | C RCT      | critical COVID-19           | Guangdong Province, China | 1                  | 60          | 18-80                     | Unclear             | Group 1: high-fow therapy by nasal cannulae (HFNC)<br>Group 2: bag- valve mask oxygenation (SMO)                                                                                                                                            | Primary outcomes: 1<br>Secondary outcomes: 6 |
| Du [64]           | R RCT      | COVID-19                    | Hubei province, China     | 1                  | 100         | ≥18                       | Unclear             | Group 1: CT<br>Group 2: methylprednisolone + CT                                                                                                                                                                                             | Primary outcomes: 5<br>Secondary outcomes: 0 |
| Qu J [65]         | RCT        | COVID-19 (Mild/common type) | Shanghai, China           | 1                  | 380         | ≥18                       | Unclear             | Group 1: Arbidol tablets + CT<br>Group 2: CT                                                                                                                                                                                                | Primary outcomes: 1<br>Secondary outcomes: 8 |
| Not Provided [66] | RCT        | COVID-19                    | Beijing, China            | 4                  | 80          | ≥18                       | 5 days              | Group 1: standard care<br>Group 2: standard care + Methylprednisolone                                                                                                                                                                       | Primary outcomes: 2<br>Secondary outcomes: 8 |
| Lu H [67]         | RCT        | COVID-19                    | Shanghai, China           | 1                  | 30          | Child, Adult, Older Adult | Unclear             | Group 1: Darunavir + Cobicistat + CT<br>Group 2: CT                                                                                                                                                                                         | Primary outcomes: 1<br>Secondary outcomes: 5 |
| Qin [68]          | N RCT      | COVID-19                    | Hubei province, China     | 1                  | 100         | ≥18                       | 2 weeks             | Group 1: Abidol hydrochloride<br>Group 2: Abidol Hydrochloride + Interferon atomization                                                                                                                                                     | Primary outcomes: 2<br>Secondary outcomes: 5 |
| Qin [69]          | N RCT      | COVID-19                    | Hubei province, China     | 1                  | 400         | ≥18                       | 2 weeks             | Group 1: Symptomatic supportive treatment<br>Group 2: Abidol hydrochloride was added on the basis of group 1.<br>Group 3: Oseltamivir was added on the basis of group 1.<br>Group 4: Lopinavir/ritonavir was added on the basis of group 1. | Primary outcomes: 2<br>Secondary outcomes: 5 |

| Study ID   | Study type | Type of disease                 | Primary sponsor           | Number of settings | Sample size | Population' age (years) | Course of treatment | Intervention                                                                                                                                                                                                                                      | Number of outcomes                                                 |
|------------|------------|---------------------------------|---------------------------|--------------------|-------------|-------------------------|---------------------|---------------------------------------------------------------------------------------------------------------------------------------------------------------------------------------------------------------------------------------------------|--------------------------------------------------------------------|
| Cao [70]   | B RCT      | COVID-19                        | Beijing, China            | 2                  | 308         | ≥18                     | 9 days              | Group 1: Remdesivir group active<br>Group 2: Control group<br>Placebos matched remdesivir                                                                                                                                                         | Primary outcomes: 1<br>Secondary outcomes: 10                      |
| Cao [71]   | B RCT      | Severe COVID-19                 | Beijing, China            | 1                  | 452         | ≥18                     | 9 days              | Group 1: Remdesivir<br>Group 2: Remdesivir Placebo                                                                                                                                                                                                | Primary outcomes: 1<br>Secondary outcomes: 10                      |
| Qu J [72]  | RCT        | Mild or common type of COVID-19 | Shanghai, China           | 1                  | 380         | 18-75                   | 14-20 days          | Group 1: Arbidol tablets + basic treatment<br>Group 2: basic treatment                                                                                                                                                                            | Primary outcomes: 1<br>Secondary outcomes: 8                       |
| Qin [73]   | N RCT      | COVID-19 (without severe type)  | Hubei province, China     | 1                  | 60          | 18-55                   | 14 days             | Group 1: ASC09F+Oseltamivir<br>Group 2: Ritonavir+Oseltamivir<br>Group 3: Oseltamivir                                                                                                                                                             | Primary outcomes: 1<br>Secondary outcomes: 9                       |
| Li T [74]  | RCT        | Severe type of COVID-19         | Beijing, China            | 2                  | 80          | ≥18                     | Unclear             | Group 1: IVIG therapy+ standard care<br>Group 2: Standard care                                                                                                                                                                                    | Primary outcomes: 3<br>Secondary outcomes: 8                       |
| Lu H [75]  | RCT        | COVID-19                        | Shanghai, China           | 1                  | 30          | ≥18                     | 5 days              | Group 1: Hydroxychloroquine + CT<br>Group 2: CT                                                                                                                                                                                                   | Primary outcomes: 4<br>Secondary outcomes: 2                       |
| Zhang [76] | Z RCT      | COVID-19                        | Beijing, China            | 1                  | 200         | 16-99                   | Unclear             | Group 1: hydroxychloroquine<br>Group 2: CT                                                                                                                                                                                                        | Primary outcomes: 7<br>Secondary outcomes: 4<br>Other outcomes: 1  |
| Xia J [77] | RCT        | Mild/general COVID-19           | Guangdong Province, China | 1                  | 112         | ≥18                     | Unclear             | Group 1: Chloroquine Phosphate<br>Group 2: Lopinavir / Ritonavir                                                                                                                                                                                  | Primary outcomes: 10<br>Secondary outcomes: 2<br>Other outcomes: 1 |
| Ning [78]  | Q RCT      | COVID-19                        | Hubei province, China     | 1                  | 90          | 18-70                   | Unclear             | General patients group 1: CT<br>General patients group 2: Sodium Aescinate + CT<br>Severe patients control group 1: CT +<br>hormonotherapy<br>Severe patients control group 2: CT<br>Severe patients experimental group:<br>Sodium Aescinate + CT | Primary outcomes: 1<br>Secondary outcomes: 4                       |



| Study ID     | Study type | Type of disease                  | Primary sponsor           | Number of settings | Sample size | Population' age (years) | Course of treatment | Intervention                                                                                                                                                                   | Number of outcomes                                                |
|--------------|------------|----------------------------------|---------------------------|--------------------|-------------|-------------------------|---------------------|--------------------------------------------------------------------------------------------------------------------------------------------------------------------------------|-------------------------------------------------------------------|
| Ning [79]    | Q RCT      | severe OVID-19                   | Hubei province, China     | 1                  | 100         | ≥18                     | 7 days              | Group 1: Methylprednisolone (<40mg/d)<br>Group 2: Methylprednisolone (40~80mg/d)                                                                                               | Primary outcomes: 2<br>Secondary outcomes: 5                      |
| Qiu [80]     | Y RCT      | OVID-19                          | Zhejiang Province, China  | 2                  | 160         | 18-75                   | 14 days             | Group 1: ASC09/ritonavir<br>Group 2: lopinavir/ritonavir                                                                                                                       | Primary outcomes: 1<br>Secondary outcomes: 9                      |
| Li L [81]    | RCT        | OVID-19                          | Guangdong Province, China | 1                  | 125         | 7-14 days               | Unclear             | Group 1: CT + lopinavir/ritonavir<br>Group 2: CT + arbidol<br>Group 3: CT                                                                                                      | Primary outcomes: 1<br>Secondary outcomes: 4<br>Other outcomes: 5 |
| Wang [82]    | F Non-RC T | OVID-19                          | Beijing, China            | 7                  | 40          | 18-65                   | Unclear             | Group 1: Mesenchymal Stem Cell + CT<br>Group 2: CT                                                                                                                             | Primary outcomes: 2<br>Secondary outcomes: 7                      |
| F Zhang [83] | RCT        | Severe type of COVID-19          | Jiangsu Province, China   | 1                  | 40          | 14-70                   | Unclear             | Group 1: 5u washed microbiota suspension administered + CT<br>Group 2: 5u placebo + CT                                                                                         | Primary outcomes: 1<br>Secondary outcomes: 0                      |
| Peng [84]    | Z RCT      | Severe type of COVID-19          | Hubei province, China     | 1                  | 140         | ≥18                     | 7 days              | Group 1: Vit C + water for injection<br>Group 2: Water for injection                                                                                                           | Primary outcomes: 1<br>Secondary outcomes: 8                      |
| Cheng [85]   | X Non-RC T | Severe type of COVID-19          | Hubei province, China     | 1                  | 10          | ≥18                     | 3 days              | Group 1: Immunoglobulin of cured patients<br>Group 2: γ-Globulin                                                                                                               | Primary outcomes: 1<br>Secondary outcomes: 10                     |
| Zhang [86]   | Z RCT      | COVID-19                         | Hubei province, China     | 1                  | 238         | 18-60                   | Unclear             | Group 1: Xiyanping injection<br>Group 2: alpha-interferon                                                                                                                      | Primary outcomes: 7<br>Secondary outcomes: 5                      |
| Liu [87]     | Z RCT      | Severe type of COVID-19          | Sichuan Province, China   | 3                  | 300         | ≥18                     | Unclear             | Group 1: convalescent plasma therapy + CT<br>Group 2: CT                                                                                                                       | Primary outcomes: 1<br>Secondary outcomes: 13                     |
| Kang [88]    | Y OS       | Severe type of COVID-19          | Sichuan Province, China   | 1                  | 100         | Unclear                 | Unclear             | NA                                                                                                                                                                             | Primary outcomes: 6<br>Secondary outcomes: 0                      |
| Hu P [89]    | RCT        | Mild and common type of COVID-19 | Chongqing, China          | 2                  | 60          | 18-80                   | Unclear             | Group 1: Lopinavir / Ritonavir (Kaletra) + IFN aerosol inhalation<br>Group 2: Abidol and IFN aerosol inhalation<br>Group 3: ASC09/ Ritonavir (ASC09F) + IFN aerosol inhalation | Primary outcomes: 1<br>Secondary outcomes: 8                      |

| Study ID     | Study type   | Type of disease                      | Primary sponsor           | Number of settings | Sample size | Population' age (years) | Course of treatment | Intervention                                                                                                                                           | Number of outcomes                                                |
|--------------|--------------|--------------------------------------|---------------------------|--------------------|-------------|-------------------------|---------------------|--------------------------------------------------------------------------------------------------------------------------------------------------------|-------------------------------------------------------------------|
| Mao H [90]   | RCT          | mild and moderate COVID-19           | Chongqing, China          | 2                  | 240         | Unclear                 | Unclear             | Group 1: Hydroxychloroquin<br>Group 2: Lopinavir /Ritonavir                                                                                            | Primary outcomes: 1<br>Secondary outcomes: 11                     |
| Huang W [91] | RCT          | Common type of COVID-19              | Chongqing, China          | 4                  | 240         | ≥18                     | Unclear             | Group 1: Low-dose hydroxychloroquine + CT<br>Group 2: Medium-dose hydroxychloroquine + CT<br>Group 3: High-dose hydroxychloroquine + CT<br>Group 4: CT | Primary outcomes: 2<br>Secondary outcomes: 5<br>Other outcomes: 3 |
| Huang W [92] | RCT          | Severe and critical type of COVID-19 | Chongqing, China          | 4                  | 60          | ≥18                     | Unclear             | Group 1: Hydroxychloroquine + CT<br>Group 2: CT                                                                                                        | Primary outcomes: 2<br>Secondary outcomes: 7<br>Other outcomes: 3 |
| Xu X [93]    | RCT          | common type of COVID-19              | Anhui Province, China     | 1                  | 188         | 18-85                   | Unclear             | Group1: CT<br>Group 2: tocilizumab + CT                                                                                                                | Primary outcomes: 1<br>Secondary outcomes: 3                      |
| Lin J [94]   | RCT          | common type of COVID-19              | Hubei province, China     | 1                  | 60          | 18-75                   | Unclear             | Group 1: Diammonium Glycyrrhizinate Enteric-coated Capsules + Vitamin C tablets+ CT<br>Group 2: clinical standard antiviral treatment                  | Primary outcomes: 3<br>Secondary outcomes: 4                      |
| Huang X [95] | RCT          | COVID-19                             | Zhejiang Province, China  | 2                  | 40          | ≥18                     | Unclear             | Group 1: Polyinosinic-Polycytidylic Acid Injection + CT<br>Group 2: CT                                                                                 | Primary outcomes: 1<br>Secondary outcomes: 5                      |
| Wu W [96]    | Cohort study | Severe COVID-19                      | Hubei province, China     | 3                  | 100         | ≤75                     | Unclear             | NA                                                                                                                                                     | Primary outcomes: 1<br>Secondary outcomes: 3                      |
| Xia J [97]   | RCT          | Severe COVID-19                      | Hubei province, China     | 1                  | 120         | ≥18                     | Unclear             | Group 1: Thymosin<br>Group 2: Camrelizumab<br>Group 3: CT                                                                                              | Primary outcomes: 1<br>Secondary outcomes: 0                      |
| Xu C [98]    | RCT          | COVID-19 (without severe type)       | Guangdong Province, China | NA                 | 60          | ≥18                     | Unclear             | Group 1: Anti-aging Active Freeze-dried Powder Granules + CT<br>Group 2: CT                                                                            | Primary outcomes: 1<br>Secondary outcomes: 6                      |

| Study ID   | Study type | Type of disease                | Primary sponsor           | Number of settings | Sample size | Population' age (years) | Course of treatment | Intervention                                                                                                                                                                       | Number of outcomes                            |
|------------|------------|--------------------------------|---------------------------|--------------------|-------------|-------------------------|---------------------|------------------------------------------------------------------------------------------------------------------------------------------------------------------------------------|-----------------------------------------------|
| Xu [99]    | C RCT      | COVID-19 (without severe type) | Guangdong Province, China | NA                 | 60          | ≥18                     | Unclear             | Group 1: Intravenous infusion of Umbilical Cord Blood Mononuclear Cells preparations + CT<br>Group 2: CT                                                                           | Primary outcomes: 1<br>Secondary outcomes: 6  |
| Xu [100]   | C RCT      | COVID-19 (without severe type) | Guangdong Province, China | NA                 | 60          | ≥18                     | Unclear             | Group 1: Intravenous infusion of Cord Blood Mesenchymal Stem Cells preparations + CT<br>Group 2: CT                                                                                | Primary outcomes: 1<br>Secondary outcomes: 6  |
| Xu [101]   | C RCT      | COVID-19 (without severe type) | Guangdong Province, China | NA                 | 60          | ≥18                     | Unclear             | Group 1: High-dose NK cells + mesenchymal stem cells<br>Group 2: Conventional dose NK cells + mesenchymal stem cells<br>Group 3: Preventive dose NK cells + mesenchymal stem cells | Primary outcomes: 1<br>Secondary outcomes: 6  |
| Xie [102]  | J RCT      | COVID-19                       | Chongqing, China          | 1                  | 120         | ≥18                     | Unclear             | Group 1: Anti-PD-1 antibody<br>Group 2: Thymosin<br>Group 3: CT                                                                                                                    | Primary outcomes: 1<br>Secondary outcomes: 6  |
| Peng [103] | Z OS       | COVID-19                       | Hubei Province, China     | 2                  | 10          | 18-75                   | Unclear             | Group 1: Umbilical Cord-Derived Mesenchymal Stem Cells                                                                                                                             | Primary outcomes: 1<br>Secondary outcomes: 15 |

CT: conventional therapy (including any western routine treatment); OS: observational study; RCT: randomized controlled trial

### **The list of outcomes**

In protocols of TCM clinical trials, the number of primary outcomes are from 1 (13/34, 38.24%) to 13 (1/34, 2.94%), the number of secondary outcomes are from 1 (7/34, 20.59%) to 14 (1/34, 2.94%). 1(1/34, 2.94%) protocol of clinical trial reports other outcomes. For individual clinical trial, the number of outcomes are from 1 (2/34, 5.88%) to 15 (1/34, 2.94%). The number of outcomes in protocols of TCM clinical trials is shown in Figure 2.

In protocols of western medicine clinical trials, the number of primary outcomes are from 1 (39/63, 61.90%) to 10 (1/63, 1.59%), the number of secondary outcomes are from 0 (8/63, 12.70%) to 15(1/63, 1.59%). 5 (5/63, 7.94%) protocols of clinical trials reported other outcomes (the number of outcomes are from 1 to 5). For individual clinical trial, the number of outcomes are from 1 (4/63, 6.35%) to 16 (1/63, 1.59%). The number of outcomes in protocols of western medicine clinical trials is shown in Figure 3.

After merging and grouping outcomes, there are 76 different outcomes from 16 outcome domains in 34 protocols of TCM clinical trials (table 4). Almost half of outcomes are reported only once (34/76, 44.74%). The most frequently reported outcome is “time of SARS-CoV-2 RNA turns to negative”, which is reported 16 times. Only 3 (3/76, 3.95%) outcomes are reported more than 10 times. Only 27 (27/76, 35.53%) outcomes are provided one or more outcome measurement instruments. Only 10 outcomes are provided one or more measurement time frame. The summary of outcome reporting for protocols of TCM clinical trials is shown in Figure 4.

In the 16 outcome domains of protocols of TCM clinical trials, 4 outcome domains (adverse events/effects, hepatobiliary outcomes, mortality/survival, psychiatric outcomes) consisted of only one outcome. These outcomes are reported between 1 and 9 times, and the median outcome reporting time was 6.5. Respiratory, thoracic and mediastinal outcomes have the largest number of outcomes, which includes 17 outcomes; chest imaging is reported more frequently than other outcomes. The number of outcomes in different outcome domains in protocols of TCM clinical trials is shown in Figure 5.

After merging and grouping, there are 126 different outcomes from 17 outcome domains in 63 protocols of western medicine clinical trials (table 5). Almost half of outcomes are reported only once (62/126, 49.21%). The most frequently reported outcome is “proportion of patients with negative SARS-CoV-2”, which is reported 40 times. Only 11 (11/126, 8.73%) outcomes are reported more than 10 times. Only 27 outcomes are provided one or more outcome measurement instruments. Only 40 (40/126, 31.75%) outcomes are provided one or more measurement time frame. The summary of outcome reporting for protocols of TCM clinical trials is shown in Figure 6.

In the 17 outcome domains of protocols of western medicine clinical trials, 5 outcome domains (adverse events/effects, delivery of care, economic, metabolism and nutrition outcomes, mortality/survival) consisted of only one outcome. These outcomes are reported between 1 and 36 times, and the median outcome reporting time is 1. Respiratory, thoracic and mediastinal outcomes included the largest number of outcomes, which includes 31 outcomes; chest imaging is reported more frequently than other outcomes. The number of outcomes in different outcome domains in protocols of western medicine clinical trials is shown in Figure 7.

## **DISCUSSION**

This review is the first to evaluate the outcome reporting of protocols of TCM and western medicine clinical trials for treating COVID-19. The results showed variations in the outcome reporting. For outcome measurement instruments/outcome definitions and outcome measurement time, there is also heterogeneity. However, many primary investigators did not provide outcome measurement instruments/outcome definitions or outcome measurement time. It is difficult to predict results of clinical trials now. But it is obvious that these problems may result in the exclusion of some studies from systematic reviews/meta-analyses due to the heterogeneity of outcomes or outcome measurements. It is a waste.

In this review, we find that there are more than 40 duplicated outcomes between protocols of TCM and western medicine clinical trials. No matter for clinical trials of TCM or western medicine, etiological test, chest imaging, respiratory symptoms, temperature, mortality/survival and adverse events are very important. These outcomes are relevant to the prognosis of disease and safety of therapy.

Because of no specific therapy can be used in the treatment of COVID-19, it is necessary and urgent to conduct clinical trials, no matter what the interventions are. We believe that it is important to develop a COS for clinical trials of TCM and western medicine for treating COVID-19, so that the efficacy of different interventions can be compared and merged in systematic review/meta-analysis.

**Table 4 Outcomes from protocols of TCM clinical trials**

| Outcome domain                             | Outcomes                                                    | Number of outcomes | Defination/ outcome measurement | Time point       |
|--------------------------------------------|-------------------------------------------------------------|--------------------|---------------------------------|------------------|
| <b>Mortality/survival</b>                  |                                                             |                    |                                 |                  |
|                                            | Mortality/survival                                          | 8                  | 0                               | 28 days, 84 days |
| <b>Physiological/clinical</b>              |                                                             |                    |                                 |                  |
| <b>Blood and lymphatic system outcomes</b> |                                                             |                    |                                 |                  |
|                                            | Blood routine test                                          | 10                 | 0                               | Not provided     |
|                                            | Biochemical outcomes                                        | 6                  | 0                               | Not provided     |
|                                            | CRP                                                         | 5                  | 0                               | Not provided     |
|                                            | Coagulation outcomes                                        | 3                  | 0                               | Not provided     |
|                                            | Erythrocyte sedimentation rate                              | 1                  | 0                               | Not provided     |
|                                            | High-sensitive CRP                                          | 1                  | 0                               | Not provided     |
| <b>Cardiac outcomes</b>                    |                                                             |                    |                                 |                  |
|                                            | ECG                                                         | 1                  | 1                               | Not provided     |
|                                            | Heart function                                              | 1                  | 0                               | Not provided     |
|                                            | Heart rate                                                  | 1                  | 0                               | Not provided     |
|                                            | Myocardial enzyme                                           | 2                  | 0                               | Not provided     |
|                                            | Myoglobin                                                   | 1                  | 0                               | Not provided     |
|                                            | Troponin                                                    | 1                  | 0                               | Not provided     |
| <b>Gastrointestinal outcomes</b>           |                                                             |                    |                                 |                  |
|                                            | Clearance time of gastrointestinal symptoms                 | 1                  | 0                               | Not provided     |
|                                            | Remission of clinical symptoms: gastrointestinal discomfort | 4                  | 0                               | Not provided     |

| Outcome domain         | Outcomes                                              | Number of outcomes | Defination/ outcome measurement | Time point                                                      |
|------------------------|-------------------------------------------------------|--------------------|---------------------------------|-----------------------------------------------------------------|
| General outcomes       |                                                       |                    |                                 |                                                                 |
|                        | Blood pressure                                        | 1                  | 0                               | Not provided                                                    |
|                        | Clearance time of fatigue                             | 1                  | 0                               | Not provided                                                    |
|                        | Clearance time of fever                               | 14                 | 1                               | 1. 8 o'clock, 12 o'clock, 16 o'clock, and 20 o'clock, 2.28 days |
|                        | Clinical symptom score                                | 1                  | 0                               | Not provided                                                    |
|                        | Propotion of patients without fatigue                 | 9                  | 0                               | Not provided                                                    |
|                        | Proportion of patients without fever                  | 3                  | 0                               | Not provided                                                    |
|                        | Remission of clinical symptoms: fever                 | 4                  | 0                               | Not provided                                                    |
|                        | Temperature                                           | 3                  | 0                               | Not provided                                                    |
|                        | TCM syndromes                                         | 7                  | 0                               | Not provided                                                    |
|                        | The proportion of patients without fever              | 1                  | 0                               | Not provided                                                    |
|                        | Time to remission/disappearance of primary symptoms   | 1                  | 1                               | Not provided                                                    |
| Hepatobiliary outcomes |                                                       |                    |                                 |                                                                 |
|                        | Liver function                                        | 5                  | 0                               | Not provided                                                    |
| Immune system outcomes |                                                       |                    |                                 |                                                                 |
|                        | HLA-DR                                                | 1                  | 0                               | Not provided                                                    |
|                        | Immunoglobulin                                        | 1                  | 0                               | Not provided                                                    |
|                        | Procalcitonin                                         | 5                  | 0                               | Not provided                                                    |
|                        | Rate of subjects receiving systematic corticosteroids | 1                  | 1                               | 28 days                                                         |

| Outcome domain                                 | Outcomes                                        | Number of outcomes | Defination/ outcome measurement | Time point                                                |
|------------------------------------------------|-------------------------------------------------|--------------------|---------------------------------|-----------------------------------------------------------|
| Infection and infestation outcomes             |                                                 |                    |                                 |                                                           |
|                                                | Incidence of antibiotic treatment               | 1                  | 0                               | Not provided                                              |
|                                                | Proportion of patients with negative SARS-CoV-2 | 6                  | 0                               | at the end of the treatment, on the 28th day of treatment |
|                                                | Time of SARS-CoV-2 RNA turns to negative        | 16                 | 2                               | Not provided                                              |
| Renal and urinary outcomes                     |                                                 |                    |                                 |                                                           |
|                                                | Urine routine                                   | 2                  | 0                               | Not provided                                              |
|                                                | kidney function                                 | 5                  | 0                               | Not provided                                              |
| Psychiatric outcomes                           |                                                 |                    |                                 |                                                           |
|                                                | Psychological outcomes                          | 1                  | 0                               | Not provided                                              |
| Respiratory, thoracic and mediastinal outcomes |                                                 |                    |                                 |                                                           |
|                                                | PaO2/FiO2                                       | 4                  | 0                               | Not provided                                              |
|                                                | Chest imaging                                   | 12                 | 1                               | Not provided                                              |
|                                                | Blood oxygen saturation                         | 3                  | 0                               | Not provided                                              |
|                                                | CURB-65                                         | 1                  | 1                               | Not provided                                              |
|                                                | Clearance time of cough                         | 4                  | 0                               | Not provided                                              |
|                                                | Pulmonary function                              | 6                  | 0                               | Not provided                                              |
|                                                | Duration of mechanical ventilation              | 3                  | 1                               | 28 days                                                   |
|                                                | Improvement of lung HRCT score                  | 2                  | 1                               | Not provided                                              |
|                                                | Pneumonia severity index                        | 4                  | 1                               | Not provided                                              |
|                                                | Proportion of patients without                  | 6                  | 0                               | Not provided                                              |



| Outcome domain     | Outcomes                                                                            | Number of outcomes | Defination/ outcome measurement | Time point   |
|--------------------|-------------------------------------------------------------------------------------|--------------------|---------------------------------|--------------|
|                    | cough                                                                               |                    |                                 |              |
|                    | Proportion of patients without sputum                                               | 2                  | 0                               | Not provided |
|                    | Proportion of patients without wheezing                                             | 2                  | 0                               | Not provided |
|                    | Respiratory rate                                                                    | 1                  | 0                               | Not provided |
|                    | St Georges respiratory questionnaire (SGRQ)                                         | 4                  | 1                               | Not provided |
|                    | Time to improvement of abnormalities in Chest radiology                             | 1                  | 1                               | 28 days      |
|                    | The incidence of dyspnea with low oxygen saturation level and high respiratory rate | 1                  | 1                               | 28 days      |
|                    | Time of improvement in respiratory symptoms                                         | 1                  | 0                               | Not provided |
| <b>Functioning</b> |                                                                                     |                    |                                 |              |
|                    | Physical functioning                                                                |                    |                                 |              |
|                    | 6-minute walk test (6MWT)                                                           | 4                  | 1                               | Not provided |
|                    | APACHE II scores                                                                    | 1                  | 1                               | Not provided |
|                    | Clinical outcome                                                                    | 1                  | 1                               | 14 day       |
|                    | DIC                                                                                 | 1                  | 0                               | Not provided |
|                    | Modified Barthel Index (MBI)                                                        | 4                  | 1                               | Not provided |
|                    | Major organ function                                                                | 1                  | 0                               | Not provided |
|                    | Incidence of medical complications during hospitalization                           | 1                  | 1                               | Not provided |
|                    | Incidence of multiple organ dysfunction                                             | 1                  | 0                               | Not provided |
|                    | Patients with complications of 2019-nCoV infection                                  | 1                  | 1                               | 28 days      |

| Outcome domain                | Outcomes                                  | Number of outcomes | Defination/ outcome measurement | Time point   |
|-------------------------------|-------------------------------------------|--------------------|---------------------------------|--------------|
|                               | Recovery rate                             | 2                  | 0                               | Not provided |
|                               | SOFA score                                | 1                  | 1                               | Not provided |
|                               | Time to disease recovery                  | 5                  | 0                               | Not provided |
|                               | Time to release from isolation            | 2                  | 0                               | Not provided |
|                               | Time to Clinical Recovery                 | 1                  | 1                               | Not provided |
| Global quality of life        |                                           |                    |                                 |              |
|                               | EQ-5D                                     | 1                  | 1                               | Not provided |
|                               | SF-36                                     | 2                  | 1                               | Not provided |
| <b>Resource use</b>           |                                           |                    |                                 |              |
| Hospital                      |                                           |                    |                                 |              |
|                               | Duration of hospitalization               | 10                 | 1                               | 28 days      |
|                               | Length of stay in ICU                     | 1                  | 0                               | Not provided |
| Need for further intervention |                                           |                    |                                 |              |
|                               | The time when the condition becomes worse | 6                  | 3                               | Not provided |
|                               | Rate of progressing to the severe stage   | 7                  | 1                               | Not provided |
|                               | Rate of progressing to the critical stage | 10                 | 1                               | Not provided |
| <b>Adverse events/effects</b> |                                           |                    |                                 |              |
|                               | Adverse events                            | 9                  | 0                               | Not provided |

CRP: C-reactive protein; CURB-65: Confusion, Urea, Respiratory Rate and Age 65; ECG: electrocardiogram; HLA-DR: Human leukocyte antigen-DR; HRCT: chest high-resolution computed tomography; ICU: Intensive Care Unit; RNA: ribonucleic acid; SARS-CoV-2: Severe Acute Respiratory Syndrome Coronavirus 2; SOFA: Sequential Organ Failure Assessment; TCM: traditional Chinese medicine.

**Table 5 Outcomes from protocols of western medicine clinical trials**

| Outcome domain                      | Outcomes             | Number of outcomes | Definition/ outcome measurement | Time point                                       |
|-------------------------------------|----------------------|--------------------|---------------------------------|--------------------------------------------------|
| <b>Mortality/survival</b>           |                      |                    |                                 |                                                  |
|                                     | Mortality/survival   | 36                 | 1                               | 2 weeks, 4 weeks, 12 weeks, 14-20 days, 28 days. |
| <b>Physiological/clinical</b>       |                      |                    |                                 |                                                  |
| Blood and lymphatic system outcomes |                      |                    |                                 |                                                  |
|                                     | Blood routine test   | 16                 | 1                               | At baseline, day 1, 3, 4, 5, 7, 10, 14, 21, 28.  |
|                                     | Biochemical outcomes | 7                  |                                 | Not provided                                     |
|                                     | CRP                  | 9                  | 0                               | At Baseline, day1, 3, 5, 6, 7, 10,14, 21, 28, 90 |
|                                     | Time of CRP recovery | 1                  | 0                               | 28 days                                          |
|                                     | Coagulation outcomes | 2                  | 1                               | Day 1, 3, 5, 7, 10, 14, 21, 28                   |
|                                     | ES rate              | 1                  | 0                               | Not provided                                     |
|                                     | Rate of ES recovery  | 4                  | 0                               | Two weeks, 28 days                               |
|                                     | Time of ES recovery  | 1                  | 0                               | 28 days                                          |
| <b>Cardiac outcomes</b>             |                      |                    |                                 |                                                  |
|                                     | ECG                  | 3                  | 1                               | Not provided                                     |
|                                     | Heart rate           | 6                  | 0                               | Baseline, week 1, week 2, week 3, week 4         |
|                                     | Myocardial enzymes   | 2                  | 0                               | Day 0, 3, 4, 6, 7, 10, 14, 28, 90                |

| Outcome domain                | Outcomes                                      | Number of outcomes | Definition/ outcome measurement | Time point                                  |
|-------------------------------|-----------------------------------------------|--------------------|---------------------------------|---------------------------------------------|
|                               | Mb                                            | 1                  | 0                               | Day 1, 3, 5, 7, 10, 14, 21, 28              |
|                               | Rate of Mb recovery                           | 4                  | 0                               | Two weeks, 28 days                          |
|                               | Rate of CK recovery                           | 4                  | 0                               | Two weeks, 28 days                          |
|                               | Time of Mb recovery                           | 1                  | 0                               | 28 days                                     |
|                               | Time of CK recovery                           | 1                  | 0                               | 28 days                                     |
| <b>General outcomes</b>       |                                               |                    |                                 |                                             |
|                               | Abnormal time of temperature during infection | 1                  | 0                               | Not provided                                |
|                               | Antipyretic rate                              | 2                  | 1                               | 14-20 days                                  |
|                               | Blood pressure                                | 6                  | 0                               | Day 0 till day 21                           |
|                               | Clearance time of fever                       | 15                 | 0                               | 14-20 days, up to 28 days                   |
|                               | Clearance time of fatigue                     | 6                  | 0                               | Not provided                                |
|                               | Clearance time of myalgia                     | 2                  | 0                               | 14-20 days                                  |
|                               | Proportion of patients without fatigue        | 6                  | 0                               | Not provided                                |
|                               | Proportion of patients without dyspnea        | 5                  | 0                               | 14 days                                     |
|                               | Proportion of patients without fever          | 14                 | 0                               | Day 7, within 14 days                       |
|                               | Temperature                                   | 6                  | 0                               | Baseline, 1 week, 2 weeks, 3 weeks, 4 weeks |
| <b>Hepatobiliary outcomes</b> |                                               |                    |                                 |                                             |
|                               | ALT                                           | 1                  | 0                               | At baseline , day 3, 6, 10, 14, 28 and 90   |
|                               | Rate of ALT recovery                          | 4                  | 0                               | Two weeks, 28 days                          |
|                               | Time to ALT recovery                          | 1                  | 0                               | 28 days                                     |

| Outcome domain                     | Outcomes                          | Number of outcomes | Definition/ outcome measurement | Time point                                |
|------------------------------------|-----------------------------------|--------------------|---------------------------------|-------------------------------------------|
| Immune system outcomes             |                                   |                    |                                 |                                           |
|                                    | CD4+ T cell count                 | 1                  | 0                               | At Baseline , day 3, 6, 10, 14, 28 and 90 |
|                                    | CD8+ T cell count                 | 1                  | 0                               | At Baseline , day 3, 6, 10, 14, 28 and 90 |
|                                    | IL-2                              | 1                  | 0                               | Day 7, 14, 28                             |
|                                    | IL-4                              | 1                  | 0                               | Day 7, 14, 28                             |
|                                    | IL-6                              | 8                  | 0                               | Day 1, 3, 5, 7, 10, 14, 21, 28            |
|                                    | IL-8                              | 1                  | 0                               | On the Day28                              |
|                                    | IL-10                             | 1                  | 0                               | Day 7, 14, 28                             |
|                                    | Immunoglobulin                    | 1                  | 0                               | Not provided                              |
|                                    | Lymphocyte subsets and complement | 1                  | 0                               | Day 1, 3, 5, 7, 10, 14, 21, 28            |
|                                    | Procalcitonin                     | 4                  | 0                               | Day 1, 3, 5, 7, 10, 14, 21, 28            |
|                                    | Recovery time of lymphocyte       | 1                  | 0                               | Not provided                              |
|                                    | Time to CD4+ T cell recovery      | 1                  | 0                               | Not provided                              |
|                                    | Time to CD8+ T cell recovery      | 1                  | 0                               | Not provided                              |
|                                    | TNF- $\alpha$                     | 4                  | 0                               | Day 7, 14, 28                             |
|                                    | $\gamma$ -interferon              | 1                  | 0                               | Day 7,14, 28                              |
| Infection and infestation outcomes |                                   |                    |                                 |                                           |
|                                    | Chloroquine blood concentration   | 1                  | 0                               | Day 1, 3, 5, 7, 10, 14, 21, 28            |
|                                    | Declining speed of SARS-CoV-2     | 1                  | 1                               | Not provided                              |
|                                    | Duration of antibiotic treatment  | 1                  | 0                               | Not provided                              |

| Outcome domain                                 | Outcomes                                        | Number of outcomes | Definition/ outcome measurement | Time point                                  |
|------------------------------------------------|-------------------------------------------------|--------------------|---------------------------------|---------------------------------------------|
|                                                | Hemodiafiltration                               | 1                  | 0                               | Not provided                                |
|                                                | Incidence of antibiotic treatment               | 2                  | 0                               | Not provided                                |
|                                                | Level of virus antibody in blood sample         | 1                  | 0                               | Not provided                                |
|                                                | Other infection                                 | 1                  | 0                               | Not provided                                |
|                                                | Proportion of patients with negative SARS-CoV-2 | 40                 | 1                               | Day 0, 1, 2, 3, 4, 5, 7, 10, 14, 16, 21, 28 |
|                                                | Time of SARS-CoV-2 RNA turns to negative        | 23                 | 1                               | At baseline, day 3, 6, 7, 10, 14, 28, 90    |
| Metabolism and nutrition outcomes              |                                                 |                    |                                 |                                             |
|                                                | Liquid balance                                  | 1                  | 0                               | Not provided                                |
| Musculoskeletal and connective tissue outcomes |                                                 |                    |                                 |                                             |
|                                                | MRI of hip                                      | 1                  | 1                               | Not provided                                |
|                                                | CT of hip                                       | 1                  | 1                               | Not provided                                |
| Renal and urinary outcomes                     |                                                 |                    |                                 |                                             |
|                                                | Urine routine                                   | 1                  | 0                               | Not provided                                |
|                                                | kidney function                                 | 2                  | 1                               | Day 0, 1, 3, 4, 5, 7, 10, 14, 21, 28        |
|                                                | Incidence rate of kidney damage                 | 1                  | 0                               | Not provided                                |
| Respiratory, thoracic and mediastinal outcomes |                                                 |                    |                                 |                                             |
|                                                | Application of pulmonary surfactant             | 1                  | 0                               | Not provided                                |
|                                                | Blood oxygen saturation                         | 2                  | 0                               | Day 0 till day 21                           |

| Outcome domain | Outcomes                                            | Number of outcomes | Definition/ outcome measurement | Time point                                   |
|----------------|-----------------------------------------------------|--------------------|---------------------------------|----------------------------------------------|
|                | PaO <sub>2</sub> /FiO <sub>2</sub>                  | 7                  | 1                               | Day 1, 3, 5, 7, 10, 14, 21, 28               |
|                | Chest imaging                                       | 25                 | 2                               | At baseline , day 3, 4, 6, 7, 10, 14, 21, 28 |
|                | Clearance time of cough                             | 9                  | 0                               | 14-20 days                                   |
|                | Clearance time of dyspnea                           | 3                  | 0                               | 14-20 days, up to 28 days                    |
|                | Duration of extracorporeal membrane oxygenation     | 2                  | 0                               | Up to 28 days                                |
|                | Duration of supplemental oxygenation                | 6                  | 0                               | Up to 28 days                                |
|                | Duration of mechanical ventilation                  | 10                 | 0                               | From Day 0 through Day 28                    |
|                | Finger oxygen improvement rate                      | 2                  | 1                               | 14-20 days                                   |
|                | Frequency of requirement for mechanical ventilation | 1                  | 0                               | Up to 28 days                                |
|                | Frequency of requirement for supplemental oxygen    | 1                  | 0                               | 14 days, 28 days                             |
|                | Frequency of respiratory progression                | 2                  | 1                               | Up to 28 days                                |
|                | Murray lung injury score                            | 5                  | 1                               | 7 days, 14 days                              |
|                | Oxygen intake methods                               | 1                  | 1                               | Up to 28 days                                |
|                | Pneumonia severity index                            | 2                  | 0                               | Not provided                                 |
|                | Proportion of patients without cough                | 12                 | 0                               | Within 14 days, up to 28 days                |
|                | Respiratory rate                                    | 6                  | 1                               | Baseline, 1 week, 2 weeks, 3weeks, 4weeks    |
|                | Rate of mechanical ventilation                      | 9                  | 1                               | Day 7, 14, 15                                |
|                | Time to normalization of respiratory rate           | 1                  | 0                               | Not provided                                 |
|                | The duration of intubation                          | 1                  | 0                               | Not provided                                 |

| Outcome domain       | Outcomes                                    | Number of outcomes | Definition/ outcome measurement | Time point      |
|----------------------|---------------------------------------------|--------------------|---------------------------------|-----------------|
|                      | The incidence of hypoxia                    | 1                  | 0                               | Not provided    |
|                      | The lowest SpO2 during intubation           | 1                  | 0                               | Not provided    |
|                      | Time to chest imaging recovery              | 2                  | 1                               | Two weeks       |
|                      | The times of intubation                     | 1                  | 0                               | Not provided    |
|                      | Time of improvement in respiratory symptoms | 2                  | 0                               | Not provided    |
|                      | Time of using assisted breathing            | 2                  | 0                               | Not provided    |
|                      | Time to cough reported as mild              | 1                  | 0                               | Not provided    |
|                      | Time to dyspnea reported as mild            | 1                  | 1                               | Up to 28 days   |
|                      | Rate of no requiring supplemental oxygen    | 11                 | 0                               | 14 days         |
|                      | Ventilator parameters                       | 5                  | 1                               | Day 10 and 28   |
| <b>Functioning</b>   |                                             |                    |                                 |                 |
| Physical functioning |                                             |                    |                                 |                 |
|                      | 7-point scale                               | 1                  | 1                               | Not provided    |
|                      | APACHE II scores                            | 1                  | 1                               | Day 10          |
|                      | Complications                               | 2                  | 0                               | Not provided    |
|                      | Demand for first aid measurements           | 1                  | 1                               | On the day 28   |
|                      | Disease progression rate                    | 4                  | 1                               | 14-20 days      |
|                      | Incidence of multiple organ dysfunction     | 1                  | 0                               | Not provided    |
|                      | Incidence of shock                          | 1                  | 0                               | Not provided    |
|                      | Lower SOFA score                            | 2                  | 1                               | 7 days, 14 days |



| Outcome domain      | Outcomes                                                                      | Number of outcomes | Definition/ outcome measurement | Time point            |
|---------------------|-------------------------------------------------------------------------------|--------------------|---------------------------------|-----------------------|
|                     | NEWS2 score                                                                   | 1                  | 1                               | Not provided          |
|                     | Number of participants with improvement from severe type to common type       | 1                  | 1                               | 2 weeks               |
|                     | Organ function support measures                                               | 1                  | 0                               | Not provided          |
|                     | Organ support intensity                                                       | 1                  | 0                               | Not provided          |
|                     | Rate of severe type of disease                                                | 2                  | 0                               | Not provided          |
|                     | Rate of preventing mild to moderate patients from shifting to severe patients | 1                  | 0                               | Not provided          |
|                     | Rate of disease remission                                                     | 5                  | 1                               | Day 7, within 14 days |
|                     | SOFA score                                                                    | 3                  | 1                               | Day 7, 10             |
|                     | Time to treatment failure                                                     | 2                  | 1                               | Not provided          |
|                     | Time to NEWS2 of $\leq 2$ maintained for 24 hours.                            | 1                  | 0                               | Up to 28 days         |
|                     | Time to release from isolation                                                | 1                  | 0                               | Not provided          |
|                     | Time to severe stage                                                          | 2                  | 0                               | Not provided          |
|                     | The rate of critical stage                                                    | 3                  | 1                               | 2 weeks               |
|                     | Time to Clinical Recovery                                                     | 7                  | 4                               | 14 days, 28 days      |
|                     | Time to Clinical Improvement                                                  | 8                  | 2                               | Up to 28 days         |
| Delivery of care    |                                                                               |                    |                                 |                       |
|                     | The rate of discontinuations due to adverse events                            | 1                  | 0                               | Not provided          |
| <b>Resource use</b> |                                                                               |                    |                                 |                       |
| Economic            | Hospitalization costs                                                         | 1                  | 0                               | Not provided          |
| Hospital            |                                                                               |                    |                                 |                       |

| Outcome domain | Outcomes                                  | Number of outcomes | Definition/ outcome measurement | Time point                            |
|----------------|-------------------------------------------|--------------------|---------------------------------|---------------------------------------|
|                | Duration of hospitalization               | 23                 | 0                               | From day 0 through day 28             |
|                | Length of stay in ICU                     | 10                 | 1                               | Day 28                                |
|                | ICU free days                             | 1                  | 0                               | Up to 28 days                         |
|                | Incidence of ICU admission                | 9                  | 0                               | Day7, 14, 15, 28                      |
|                | The proportion of inpatients              | 1                  | 0                               | Within 28 days                        |
|                | Need for further intervention             |                    |                                 |                                       |
|                | The time when the condition becomes worse | 5                  | 1                               | Not provided                          |
|                | Jaw thrust maneuver                       | 1                  | 0                               | Not provided                          |
|                | Rate of progressing to the critical stage | 1                  | 1                               | Day 7                                 |
|                | Time to the critical stage                | 1                  | 1                               | Day 7                                 |
|                | <b>Adverse events/effects</b>             |                    |                                 |                                       |
|                | Adverse events                            | 29                 | 5                               | At baseline, day 3, 6, 10, 14, 28, 90 |

APACHE-II: Acute Physiology and Chronic Health Evaluation; ALT: Alanine aminotransferase; CK: Creatine Kinase; CRP: C-reactive protein; ES: Erythrocyte sedimentation; ECG: electrocardiogram; ICU: Intensive Care Unit; IL: Interleukin; Mb: Myoglobin; NEWS2: National Early Warning Score 2; RNA: ribonucleic acid; SARS-CoV-2: Severe Acute Respiratory Syndrome Coronavirus 2; SOFA: Sequential Organ Failure Assessment.

### Contributors

RQ and HS contributed to the study design. XW and MZ conducted searching and extracted data from databases. RQ, CZ, JH, YH, TH contributed to the data analysis. RQ drafted the manuscript. ML, HS, CZ, JC, HS revised the manuscript. All authors read and approved the final manuscript.

### Funding

This work was supported by the National High-level Personnel of Special Support Program [W02020052].

### Competing interests

The authors declare that there is no conflict of interest.

## Patient consent

Not required.

## Data sharing statement

The data is from public database and does not include identifiable patient data.

### References:

1. China Health Commission of the People's Republic of China. <http://www.nhc.gov.cn/xcs/yqtb/202002/67e6c59a84bd4f07b6ca4a4c5ffabb79.shtml> [Accessed 25 Feb 2020].
2. WHO. [https://www.who.int/docs/default-source/coronaviruse/situation-reports/20200225-sitrep-36-covid-19.pdf?sfvrsn=2791b4e0\\_2](https://www.who.int/docs/default-source/coronaviruse/situation-reports/20200225-sitrep-36-covid-19.pdf?sfvrsn=2791b4e0_2) [Accessed 25 Feb 2020].
3. China Health Commission of the People's Republic of China. <http://www.nhc.gov.cn/yzygj/s7653p/202002/8334a8326dd94d329df351d7da8aefc2/files/b218cfeb1bc54639af227f922bf6b817.pdf> [Accessed 25 Feb 2020].
4. Shang H, Qiu R. <http://www.comet-initiative.org/Studies/Details/1507> [Accessed 20 Feb 2020].
5. Huang C. A randomized, open-label, blank-controlled trial for the efficacy and safety of lopinavir-ritonavir and interferon-alpha 2b in hospitalization patients with novel coronavirus pneumonia (COVID-19). Available: <http://www.comet-initiative.org/Studies/Details/1507> [Accessed 14 Feb 2020].
6. ICMJE. Which trials registries are acceptable to the ICMJE? <http://www.icmje.org/about-icmje/faqs/clinical-trials-registration/> [Accessed 14 Feb 2020].
7. Dodd S, Clarke M, Becker L, et al. A taxonomy has been developed for outcomes in medical research to help improve knowledge discovery. *J Clin Epidemiol* 2018, 96:84-92.
8. Zhong N, Song Y, Qiu H, Li Y, Liu X. A prospective comparative study for Xue-Bi-Jing injection in the treatment of novel coronavirus pneumonia (COVID-19). <http://www.chictr.org.cn/showproj.aspx?proj=48768> [Accessed 14 Feb 2020].
9. Huang L. Clinical Controlled Trial for Traditional Chinese Medicine in the treatment of Novel Coronavirus Pneumonia (COVID-19). <http://www.chictr.org.cn/showproj.aspx?proj=48824> [Accessed 14 Feb 2020].
10. Liang T, Wang T, Hao X, et al. Chinese Herbal medicine for Severe novel coronavirus pneumonia (COVID-19): a Randomized Controlled Trial. <http://www.chictr.org.cn/showproj.aspx?proj=48886> [Accessed 14 Feb 2020].
11. Liu Q, Miao Q, Zhang B. A randomized controlled trial of integrated TCM and Western Medicine in the treatment of severe novel coronavirus pneumonia (COVID-19). <http://www.chictr.org.cn/showproj.aspx?proj=48911> [Accessed 14 Feb 2020].
12. Xia W, An C, Zhang B. A single arm study for combination of traditional Chinese and Western Medicine in the treatment of novel coronavirus pneumonia (COVID-19). <http://www.chictr.org.cn/showproj.aspx?proj=48913> [Accessed 14 Feb 2020].
13. Wang Y, Li X, Zhang B. Combination of traditional Chinese medicine and western medicine in the treatment of common type novel coronavirus pneumonia (COVID-19). <http://www.chictr.org.cn/showproj.aspx?proj=48904> [Accessed 14 Feb 2020].
14. Li J, Li S. A single arm study for evaluation of integrated traditional Chinese and western medicine in the treatment of novel coronavirus pneumonia (COVID-19). <http://www.chictr.org.cn/showproj.aspx?proj=48884> [Accessed 14 Feb 2020].
15. Zhong N, Zhang B, Li J, et al. A randomized, open-label, blank-controlled trial for Lian-Hua Qing-Wen Capsule/Granule in the treatment of novel coronavirus pneumonia (COVID-19).

<http://www.chictr.org.cn/showproj.aspx?proj=48889> [Accessed 14 Feb 2020].

16. Yang Z, Wen M. A Real World Study for the Efficacy and Safety of Large Dose Tanreqing Injection in the Treatment of Patients with Novel Coronavirus Pneumonia (COVID-19). <http://www.chictr.org.cn/showproj.aspx?proj=48881> [Accessed 14 Feb 2020].

17. Zhang J. Traditional Chinese Medicine for Pulmonary Fibrosis, Pulmonary Function and Quality of Life in Patients With Novel Coronavirus Pneumonia (COVID-19) in Convalescent Period: a Randomized Controlled Trial. <http://www.chictr.org.cn/showproj.aspx?proj=48931> [Accessed 14 Feb 2020].

18. Zheng C. The effect of shadowboxing for pulmonary function and quality of life in patients with novel coronavirus pneumonia (COVID-19) in rehabilitation period. <http://www.chictr.org.cn/showproj.aspx?proj=48930> [Accessed 14 Feb 2020].

19. Xia W. The effect of pulmonary rehabilitation for pulmonary function and quality of life in patients with novel coronavirus pneumonia (COVID-19) in rehabilitation period. <http://www.chictr.org.cn/showproj.aspx?proj=48929> [Accessed 14 Feb 2020].

20. Xia W. A randomized controlled trial for integrated traditional Chinese medicine and western medicine in the Treatment of Common Type Novel Coronavirus Pneumonia (COVID-19). <http://www.chictr.org.cn/showproj.aspx?proj=48927> [Accessed 14 Feb 2020].

21. Wen C. Chinese medicine prevention and treatment program for novel coronavirus pneumonia (COVID-19): a perspective, double-blind, placebo, randomised controlled trial. <http://www.chictr.org.cn/showproj.aspx?proj=48860> [Accessed 14 Feb 2020].

22. Xie C. Recommendations of Integrated Traditional Chinese and Western Medicine for Novel Coronavirus Pneumonia (COVID-19). <http://www.chictr.org.cn/showproj.aspx?proj=49014> [Accessed 14 Feb 2020].

23. Xie C. Recommendations of Integrated Traditional Chinese and Western Medicine for Diagnosis and Treatment of Novel Coronavirus Pneumonia (COVID-19) in Sichuan Province. <http://www.chictr.org.cn/showproj.aspx?proj=48792> [Accessed 14 Feb 2020].

24. Wen C. Chinese medicine prevention and treatment program for novel coronavirus pneumonia (COVID-19): a perspective, sing-arm trial. <http://www.chictr.org.cn/showproj.aspx?proj=49080> [Accessed 14 Feb 2020].

25. Liu Q. An open, prospective, multicenter clinical study for the efficacy and safety of Reduning injection in the treatment of novel coronavirus pneumonia (COVID-19). <http://www.chictr.org.cn/showproj.aspx?proj=49104> [Accessed 14 Feb 2020].

26. Wang D, Zhao J. A randomized, open-label, blank-controlled, multicenter trial for Shuang-Huang-Lian oral solution in the treatment of novel coronavirus pneumonia (COVID-19). <http://www.chictr.org.cn/showproj.aspx?proj=49051> [Accessed 14 Feb 2020].

27. Zhang Z. An observational study for Xin-Guan-1 formula in the treatment of novel coronavirus pneumonia (COVID-19). <http://www.chictr.org.cn/showproj.aspx?proj=49127> [Accessed 14 Feb 2020].

28. Xiao X. Treatment and Prevention of Traditional Chinese Medicines (TCMs) on 2019-nCoV Infection.

29. Zhang N. Effect evaluation and prognosis of Chinese medicine based on Novel Coronavirus Pneumonia (COVID-19) . <http://www.chictr.org.cn/showproj.aspx?proj=49287> [Accessed 14 Feb 2020].

30. Mao W. Clinical Study for Traditional Chinese Medicine in the Prevention and Treatment of Novel Coronavirus Pneumonia (COVID-19). <http://www.chictr.org.cn/showproj.aspx?proj=49354> [Accessed 14 Feb 2020].

31. Liu D. A randomized, open, parallel-controlled clinical trial on the efficacy and safety of Jingyebaidu granules in treating novel coronavirus pneumonia (COVID-19). <http://www.chictr.org.cn/showproj.aspx?proj=49301> [Accessed 14 Feb 2020].

32. Huang L, Li Z. The efficacy of traditional chinese medicine on Novel Coronavirus Pneumonia (COVID-19)

patients treated in square cabin hospital: a prospective, randomized controlled trial. <http://www.chictr.org.cn/showproj.aspx?proj=49408> [Accessed 14 Feb 2020].

33. Lv D. Babaodan Capsule used for the adjuvant treatment of Severe novel coronavirus pneumonia (COVID-19). <http://www.chictr.org.cn/showproj.aspx?proj=49415> [Accessed 14 Feb 2020].

34. Huang T, Fang B, Feng J, et al. A multicenter, randomized, controlled trial for integrated chinese and western medicine in the treatment of novel coronavirus pneumonia (COVID-19) based on the 'Truncated Torsion' strategy. [p://www.chictr.org.cn/showproj.aspx?proj=49380](http://www.chictr.org.cn/showproj.aspx?proj=49380) [Accessed 14 Feb 2020].

35. Zhang W. Clinical Study for Traditional Chinese Medicine Combined With Western Medicine in Treatment of Novel Coronavirus Pneumonia (COVID-19). <http://www.chictr.org.cn/showproj.aspx?proj=49422> [Accessed 14 Feb 2020].

36. Zheng X. A multicenter, randomized, open, controlled trial for the efficacy and safety of Shen-Qi Fu-Zheng injection in the treatment of novel coronavirus pneumonia (COVID-19). <http://www.chictr.org.cn/showproj.aspx?proj=49220> [Accessed 14 Feb 2020].

37. Zheng X. A multicenter, randomized, open and controlled trial for the efficacy and safety of Kang-Bing-Du granules in the treatment of novel coronavirus pneumonia (COVID-19). <http://www.chictr.org.cn/showproj.aspx?proj=49138> [Accessed 14 Feb 2020].

38. Zhang Y, Shang J. Traditional Chinese medicine cooperative therapy for patients with novel coronavirus pneumonia (COVID-19): a randomized controlled trial. <http://www.chictr.org.cn/showproj.aspx?proj=49452> [Accessed 14 Feb 2020].

39. Wang L. Clinical study for the integration of traditional Chinese and western medicine in the treatment of novel coronavirus pneumonia (COVID-19). <http://www.chictr.org.cn/showproj.aspx?proj=49453> [Accessed 14 Feb 2020].

40. Lu H, Chen X. Clinical Trial for Tanreqing Capsules in the Treatment of Novel Coronavirus Pneumonia (COVID-19). <http://www.chictr.org.cn/showproj.aspx?proj=49425> [Accessed 14 Feb 2020].

41. Zhai X. Clinical Trial for Integrated Chinese and Western Medicine in the Treatment of Children with Novel Coronavirus Pneumonia (COVID-19). <http://www.chictr.org.cn/showproj.aspx?proj=49387> [Accessed 14 Feb 2020].

42. Chen Y. Adjunctive Corticosteroid Therapy for Patients with Severe Novel Coronavirus Pneumonia (COVID-19): a Randomized Controlled Trial . <http://www.chictr.org.cn/showproj.aspx?proj=48777> [Accessed 14 Feb 2020].

43. Zhao D. Clinical study for the remedy of M1 macrophages target in the treatment of novel coronavirus pneumonia (COVID-19) . <http://www.chictr.org.cn/showproj.aspx?proj=48907> [Accessed 14 Feb 2020].

44. Jiang H. A real-world study for lopinavir/ritonavir (LPV/r) and emtricitabine (FTC) / Tenofovir alafenamide Fumarate tablets (TAF) regimen in the treatment of novel coronavirus pneumonia (COVID-19) . <http://www.chictr.org.cn/showproj.aspx?proj=48919> [Accessed 14 Feb 2020].

45. Jiang S. Study for the efficacy of chloroquine in patients with novel coronavirus pneumonia (COVID-19). <http://www.chictr.org.cn/showproj.aspx?proj=48968> [Accessed 14 Feb 2020].

46. Wang X, Ke H. A randomised, open, controlled trial for darunavir/cobicistat or Lopinavir/ritonavir combined with thymosin a1 in the treatment of novel coronavirus pneumonia (COVID-19) . <http://www.chictr.org.cn/showproj.aspx?proj=48992> [Accessed 14 Feb 2020].

47. Zhao J. A randomized, open-label study to evaluate the efficacy and safety of Lopinavir-Ritonavir in patients with mild novel coronavirus pneumonia (COVID-19) . <http://www.chictr.org.cn/showproj.aspx?proj=48991> [Accessed 14 Feb 2020].

48. Gong G. A randomized, open label, parallel controlled trial for evaluating the efficacy of recombinant

cytokine gene-derived protein injection in eliminating novel coronavirus in patients with novel coronavirus pneumonia (COVID-19) . <http://www.chictr.org.cn/showproj.aspx?proj=48809> [Accessed 14 Feb 2020].

49. Qiu Y. Randomized, open-label, controlled trial for evaluating of the efficacy and safety of Baloxavir Marboxil, Favipiravir, and Lopinavir-Ritonavir in the treatment of novel coronavirus pneumonia (COVID-19) patients . <http://www.chictr.org.cn/showproj.aspx?proj=49015> [Accessed 14 Feb 2020].

50. Zhang Z. Therapeutic effect of hydroxychloroquine on novel coronavirus pneumonia (COVID-19) . <http://www.chictr.org.cn/showproj.aspx?proj=48880> [Accessed 14 Feb 2020].

51. Lv Q. A multicenter, randomized, open-label, positive-controlled trial for the efficacy and safety of recombinant cytokine gene-derived protein injection combined with abidole, lopinavir/litonavir in the treatment of novel coronavirus pneumonia (COVID-19) patients . <http://www.chictr.org.cn/showproj.aspx?proj=49065> [Accessed 14 Feb 2020].

52. Zhou J. A prospective, single-blind, randomized controlled trial for Ruxolitinib combined with mesenchymal stem cell infusion in the treatment of patients with severe novel coronavirus pneumonia (COVID-19) . <http://www.chictr.org.cn/showproj.aspx?proj=49088> [Accessed 14 Feb 2020].

53. Qiu Y. A Randomized, Open-Label, Multi-Centre Clinical Trial Evaluating and Comparing the Safety and Efficiency of ASC09/Ritonavir and Lopinavir/Ritonavir for Confirmed Cases of Novel Coronavirus Pneumonia (COVID-19) . <http://www.chictr.org.cn/showproj.aspx?proj=49075> [Accessed 14 Feb 2020].

54. Liu Y. Clinical study for safety and efficacy of Favipiravir in the treatment of novel coronavirus pneumonia (COVID-19) . <http://www.chictr.org.cn/showproj.aspx?proj=49042> [Accessed 14 Feb 2020].

55. Chen Y. Comparison of efficacy and safety of three antiviral regimens in patients with mild to moderate novel coronavirus pneumonia (COVID-19): a randomized controlled trial. <http://www.chictr.org.cn/showproj.aspx?proj=48782> [Accessed 14 Feb 2020].

56. Shan H. A prospective, open-label, multiple-center study for the efficacy of chloroquine phosphate in patients with novel coronavirus pneumonia (COVID-19) . <http://www.chictr.org.cn/showproj.aspx?proj=49145> [Accessed 14 Feb 2020].

57. Pei B. Safety and efficacy of umbilical cord blood mononuclear cells in the treatment of severe and critically novel coronavirus pneumonia(COVID-19): a randomized controlled clinical trial. <http://www.chictr.org.cn/showproj.aspx?proj=41760> [Accessed 14 Feb 2020].

58. Pei B. Safety and efficacy of umbilical cord blood mononuclear cells conditioned medium in the treatment of severe and critically novel coronavirus pneumonia (COVID-19): a randomized controlled trial. <http://www.chictr.org.cn/showproj.aspx?proj=49062> [Accessed 14 Feb 2020].

59. Qiu Y. A randomized controlled trial for the efficacy and safety of Baloxavir Marboxil, Favipiravir tablets in novel coronavirus pneumonia (COVID-19) patients who are still positive on virus detection under the current antiviral therapy. <http://www.chictr.org.cn/showproj.aspx?proj=49013> [Accessed 14 Feb 2020].

60. Hu B, Li W. Efficacy and safety of aerosol inhalation of vMIP in the treatment of novel coronavirus pneumonia (COVID-19): a single arm clinical trial. <http://www.chictr.org.cn/showproj.aspx?proj=49215> [Accessed 14 Feb 2020].

61. Liu L. Multicenter randomized controlled trial for novel recombinant high-efficiency compound interferon in the treatment of novel coronavirus pneumonia (COVID-19). <http://www.chictr.org.cn/showproj.aspx?proj=49224> [Accessed 14 Feb 2020].

62. Li L, Xu X, Xiang C. Clinical Study for Human Menstrual Blood-Derived Stem Cells in the Treatment of Acute Novel Coronavirus Pneumonia (COVID-19). <http://www.chictr.org.cn/showproj.aspx?proj=49146> [Accessed 14 Feb 2020].

63. Wu C. Nasal high-fow preoxygenation assisted fibre-optic bronchoscope intubation in patients with critical

novel coronavirus pneumonia (COVID-19) . <http://www.chictr.org.cn/showproj.aspx?proj=49074> [Accessed 14 Feb 2020].

64. Du R. A randomized, open-label study to evaluate the efficacy and safety of low-dose corticosteroids in hospitalized patients with novel coronavirus pneumonia (COVID-19). <http://www.chictr.org.cn/showproj.aspx?proj=49086> [Accessed 14 Feb 2020].

65. Qu J. Clinical study of arbidol hydrochloride tablets in the treatment of novel coronavirus pneumonia (COVID-19). <http://www.chictr.org.cn/showproj.aspx?proj=49165> [Accessed 14 Feb 2020].

66. Unclear. Glucocorticoid Therapy for Critically Ill Patients With Severe Acute Respiratory Infections Caused by Noval Coronavirus 2019-nCoV: a Prospective, Randomized Controlled Trial. <https://clinicaltrials.gov/ct2/show/record/NCT04244591> [Accessed 14 Feb 2020].

67. Lu H. Efficacy and Safety of Darunavir and Cobicistat for Treatment of Pneumonia Caused by 2019-nCoV (DACO-nCoV) . <https://clinicaltrials.gov/ct2/show/NCT04252274?cond=nCoV&draw=1&rank=6> [Accessed 14 Feb 2020].

68. Qin N. A Prospective,Randomized Controlled Clinical Study of Interferon Atomization in the 2019-nCoV Pneumonia . <https://clinicaltrials.gov/ct2/show/NCT04254874?cond=nCoV&draw=2&rank=3> [Accessed 14 Feb 2020].

69. Qin N. A Prospective,Randomized Controlled Clinical Study of Antiviral Therapy in the 2019-nCoV Pneumonia . <https://clinicaltrials.gov/ct2/show/NCT04255017?cond=nCoV&draw=2&rank=2> [Accessed 14 Feb 2020].

70. Cao B. Mild/Moderate 2019-nCoV Remdesivir RCT. <https://clinicaltrials.gov/ct2/show/NCT04252664?cond=nCoV&draw=2&rank=1> [Accessed 14 Feb 2020].

71. Cao B. Severe 2019-nCoV Remdesivir RCT. <https://clinicaltrials.gov/ct2/show/NCT04257656?cond=nCoV&draw=2&rank=7> [Accessed 14 Feb 2020].

72. Qu J. Clinical Study of Arbidol Hydrochloride Tablets in the Treatment of Pneumonia Caused by Novel Coronavirus. <https://clinicaltrials.gov/ct2/show/NCT04260594?cond=nCoV&draw=2&rank=6> [Accessed 14 Feb 2020].

73. Qin N. A Randomized,Open,Controlled Clinical Study to Evaluate the Efficacy of ASC09F and Ritonavir for 2019-nCoV Pneumonia. <https://clinicaltrials.gov/ct2/show/NCT04261270?cond=nCoV&draw=2&rank=5> [Accessed 14 Feb 2020].

74. Li T. The Efficacy of Intravenous Immunoglobulin Therapy for Severe 2019-nCoV Infected Pneumonia . <https://clinicaltrials.gov/ct2/show/NCT04261426?cond=nCoV&draw=2&rank=2> [Accessed 14 Feb 2020].

75. Lu H. Efficacy and Safety of Hydroxychloroquine for Treatment of Pneumonia Caused by 2019-nCoV ( HC-nCoV ). <https://clinicaltrials.gov/ct2/show/NCT04261517?cond=nCoV&draw=3&rank=13> [Accessed 14 Feb 2020].

76. Zhang Z. Efficacy of therapeutic effects of hydroxychloroquine in novel coronavirus pneumonia (COVID-19) patients(randomized open-label control clinical trial). <http://www.chictr.org.cn/showproj.aspx?proj=49317> [Accessed 14 Feb 2020].

77. Xia J. Efficacy of Chloroquine and Lopinavir/ Ritonavir in mild/general novel coronavirus (CoVID-19) infections: a prospective, open-label, multicenter randomized controlled clinical study. <http://www.chictr.org.cn/showproj.aspx?proj=49263> [Accessed 14 Feb 2020].

78. Ning Q, Han M. A randomized, parallel controlled trial for the efficacy and safety of Sodium Aescinate Injection in the treatment of patients with pneumonia (COVID-19). <http://www.chictr.org.cn/showproj.aspx?proj=49297> [Accessed 14 Feb 2020].

79. Qin N. The Efficacy of Different Hormone Doses in 2019-nCoV Severe Pneumonia. <https://clinicaltrials.gov/ct2/show/NCT04263402?id=NCT04263402&draw=2&rank=1> [Accessed 14 Feb 2020].
80. Qiu Y. Evaluating and Comparing the Safety and Efficiency of ASC09/Ritonavir and Lopinavir/Ritonavir for Novel Coronavirus Infection . <https://clinicaltrials.gov/ct2/show/NCT04261907?id=NCT04261907&draw=2&rank=1> [Accessed 14 Feb 2020].
81. Li L. The Efficacy of Lopinavir Plus Ritonavir and Arbidol Against Novel Coronavirus Infection (ELACOI). <https://clinicaltrials.gov/ct2/show/NCT04252885?id=NCT04252885&draw=2&rank=1> [Accessed 14 Feb 2020].
82. Shi L, Wang F. Patients Infected With 2019 Novel Coronavirus . <https://clinicaltrials.gov/ct2/show/NCT04252118?id=NCT04252118&draw=2&rank=1> [Accessed 14 Feb 2020].
83. Zhang F. Washed Microbiota Transplantation for Patients With 2019-nCoV Infection. <https://clinicaltrials.gov/ct2/show/NCT04251767?cond=%E2%80%9C2019-nCoV+OR+Novel+Coronavirus+OR+New+Coronavirus+OR+NCP+OR+Novel+Coronavirus+Pneumonia+OR+COVID-19+OR+SARS-CoV-2+OR+Wuhan+pneumonia%E2%80%9D&draw=2&rank=10> [Accessed 14 Feb 2020].
84. Peng Z. Vitamin C Infusion for the Treatment of Severe 2019-nCoV Infected Pneumonia. <https://clinicaltrials.gov/ct2/show/NCT04264533?cond=%E2%80%9C2019-nCoV+OR+Novel+Coronavirus+OR+New+Coronavirus+OR+NCP+OR+Novel+Coronavirus+Pneumonia+OR+COVID-19+OR+SARS-CoV-2+OR+Wuhan+pneumonia%E2%80%9D&draw=2&rank=12> [Accessed 14 Feb 2020].
85. Chen X. Treatment of Acute Severe 2019-nCoV Pneumonia With Immunoglobulin From Cured Patients . <https://clinicaltrials.gov/ct2/show/NCT04264858?cond=2019-nCoV+OR+Novel+Coronavirus+OR+New+Coronavirus+OR+NCP+OR+Novel+Coronavirus+Pneumonia+OR+COVID-19+OR+SARS-CoV-2+OR+Wuhan+pneumonia&draw=2&rank=13> [Accessed 14 Feb 2020].
86. Zhang Z. Clinical study of nebulized Xiyanping injection in the treatment of novel coronavirus pneumonia (COVID-19). <http://www.chictr.org.cn/showproj.aspx?proj=49222> [Accessed 14 Feb 2020].
87. Liu Z. Convalescent plasma for the treatment of severe novel coronavirus pneumonia (COVID-19): a prospective randomized controlled trial. <http://www.chictr.org.cn/showproj.aspx?proj=49081> [Accessed 14 Feb 2020].
88. Kang Y. Cohort Study of Novel Coronavirus Pneumonia (COVID-19) Critical Ill Patients . <http://www.chictr.org.cn/showproj.aspx?proj=49295> [Accessed 14 Feb 2020].
89. Hu P. A multicenter, randomized, open label, controlled trial for the efficacy and safety of ASC09/ Ritonavir compound tablets and Lopinavir/ Ritonavir (Kaletra) and Arbidol tablets in the treatment of novel coronavirus pneumonia (COVID-19). <http://www.chictr.org.cn/showproj.aspx?proj=49352> [Accessed 14 Feb 2020].
90. Mao H. A study for the efficacy of hydroxychloroquine for mild and moderate COVID-19 infectious diseases . <http://www.chictr.org.cn/showproj.aspx?proj=49369> [Accessed 14 Feb 2020].
91. Huang W. Clinical study on the safety and effectiveness of Hydroxychloroquine Sulfate tablets in the treatment of patients with novel coronavirus pneumonia (COVID-19). <http://www.chictr.org.cn/showproj.aspx?proj=49400> [Accessed 14 Feb 2020].
92. Huang W. Clinical study for the effect and safety of hydroxychloroquine sulfate tablets in the treatment of patients with severe novel coronavirus pneumonia (COVID-19). <http://www.chictr.org.cn/showproj.aspx?proj=49404> [Accessed 14 Feb 2020].
93. Xu X. A multicenter, randomized controlled trial for the efficacy and safety of tocilizumab in the treatment of new coronavirus pneumonia (COVID-19). <http://www.chictr.org.cn/showproj.aspx?proj=49409> [Accessed 14 Feb 2020].
94. Lin J. A randomized, open, controlled trial for diammonium glycyrrhizinate enteric-coated capsules



combined with vitamin C tablets in the treatment of common novel coronavirus pneumonia (COVID-19) in the basic of clinical standard antiviral treatment to evaluate the safety and efficiency .

<http://www.chictr.org.cn/showproj.aspx?proj=49>

131 [Accessed 14 Feb 2020].

95. Huang X. A randomized, open-label, blank-controlled, multicenter trial for Polyinosinic-Polycytidylic Acid Injection in the treatment of novel coronavirus pneumonia (COVID-19).

<http://www.chictr.org.cn/showproj.aspx?proj=49342> [Accessed 14 Feb 2020].

96. Wu W. Clinical Application of ECMO in the Treatment of Patients with Very Serious Respiratory Failure due to novel Coronavirus Pneumonia (COVID-19). <http://www.chictr.org.cn/showproj.aspx?proj=49178> [Accessed 14 Feb 2020].

97. Xia J. Immunomodulatory Therapy for Severe Novel Coronavirus Pneumonia (COVID-19). <http://www.chictr.org.cn/showproj.aspx?proj=49161> [Accessed 14 Feb 2020].

98. Xu C. Clinical Study for Anti-aging Active Freeze-dried Powder Granules in the Treatment of Acute Novel Coronavirus Pneumonia (COVID-19). <http://www.chictr.org.cn/showproj.aspx?proj=49355> [Accessed 14 Feb 2020].

99. Xu C. Clinical Study for Umbilical Cord Blood Mononuclear Cells in the Treatment of Acute Novel Coronavirus Pneumonia (COVID-19) . <http://www.chictr.org.cn/showproj.aspx?proj=49374> [Accessed 14 Feb 2020].

100. Xu C. Clinical Study for Cord Blood Mesenchymal Stem Cells in the Treatment of Acute Novel Coronavirus Pneumonia (COVID-19) . <http://www.chictr.org.cn/showproj.aspx?proj=49389> [Accessed 14 Feb 2020].

101. Xu C. Clinical Study of Cord Blood NK Cells Combined with Cord Blood Mesenchymal Stem Cells in the Treatment of Acute Novel Coronavirus Pneumonia (COVID-19). <http://www.chictr.org.cn/showproj.aspx?proj=49384> [Accessed 14 Feb 2020].

102. Xie J. Immunoregulatory Therapy for 2019-nCoV. <https://clinicaltrials.gov/ct2/show/NCT04268537?cond=%222019-nCoV%22+OR+%22Novel+Coronavirus%22+OR+%22New+Coronavirus%22+OR+%22SARS-CoV-2%22OR+%22SARI%22OR+%22NCP%22+OR+%22Novel+Coronavirus+Pneumonia%22+OR+%22COVID-19%22++OR+%22Wuhan+pneumonia%22&draw=2&ra> [Accessed 14 Feb 2020].

103. Peng Z. Umbilical Cord(UC)-Derived Mesenchymal Stem Cells(MSCs) Treatment for the 2019-novel Coronavirus(nCOV) Pneumonia.

<https://clinicaltrials.gov/ct2/show/NCT04269525?cond=%222019-nCoV%22+OR+%22Novel+Coronavirus%22+OR+%22New+Coronavirus%22+OR+%22SARS-CoV-2%22OR+%22SARI%22OR+%22NCP%22+OR+%22Novel+Coronavirus+Pneumonia%22+OR+%22COVID-19%22++OR+%22Wuhan+pneumonia%22&draw=3&ra> [Accessed 14 Feb 2020].

Figure 1. The distribution of clinical trials

Figure 2. The number of outcomes in protocols of TCM clinical trials

Figure 3. The number of outcomes in protocols of western medicine clinical trials

Figure 4. The summary of outcome reporting for protocols of TCM clinical trials

Figure 5. The number of outcomes in different outcome domains in protocols of TCM clinical trials

Figure 6. The summary of outcome reporting for protocols of western medicine clinical trials

Figure 7. The number of outcomes in different outcome domains in protocols of western medicine clinical trials

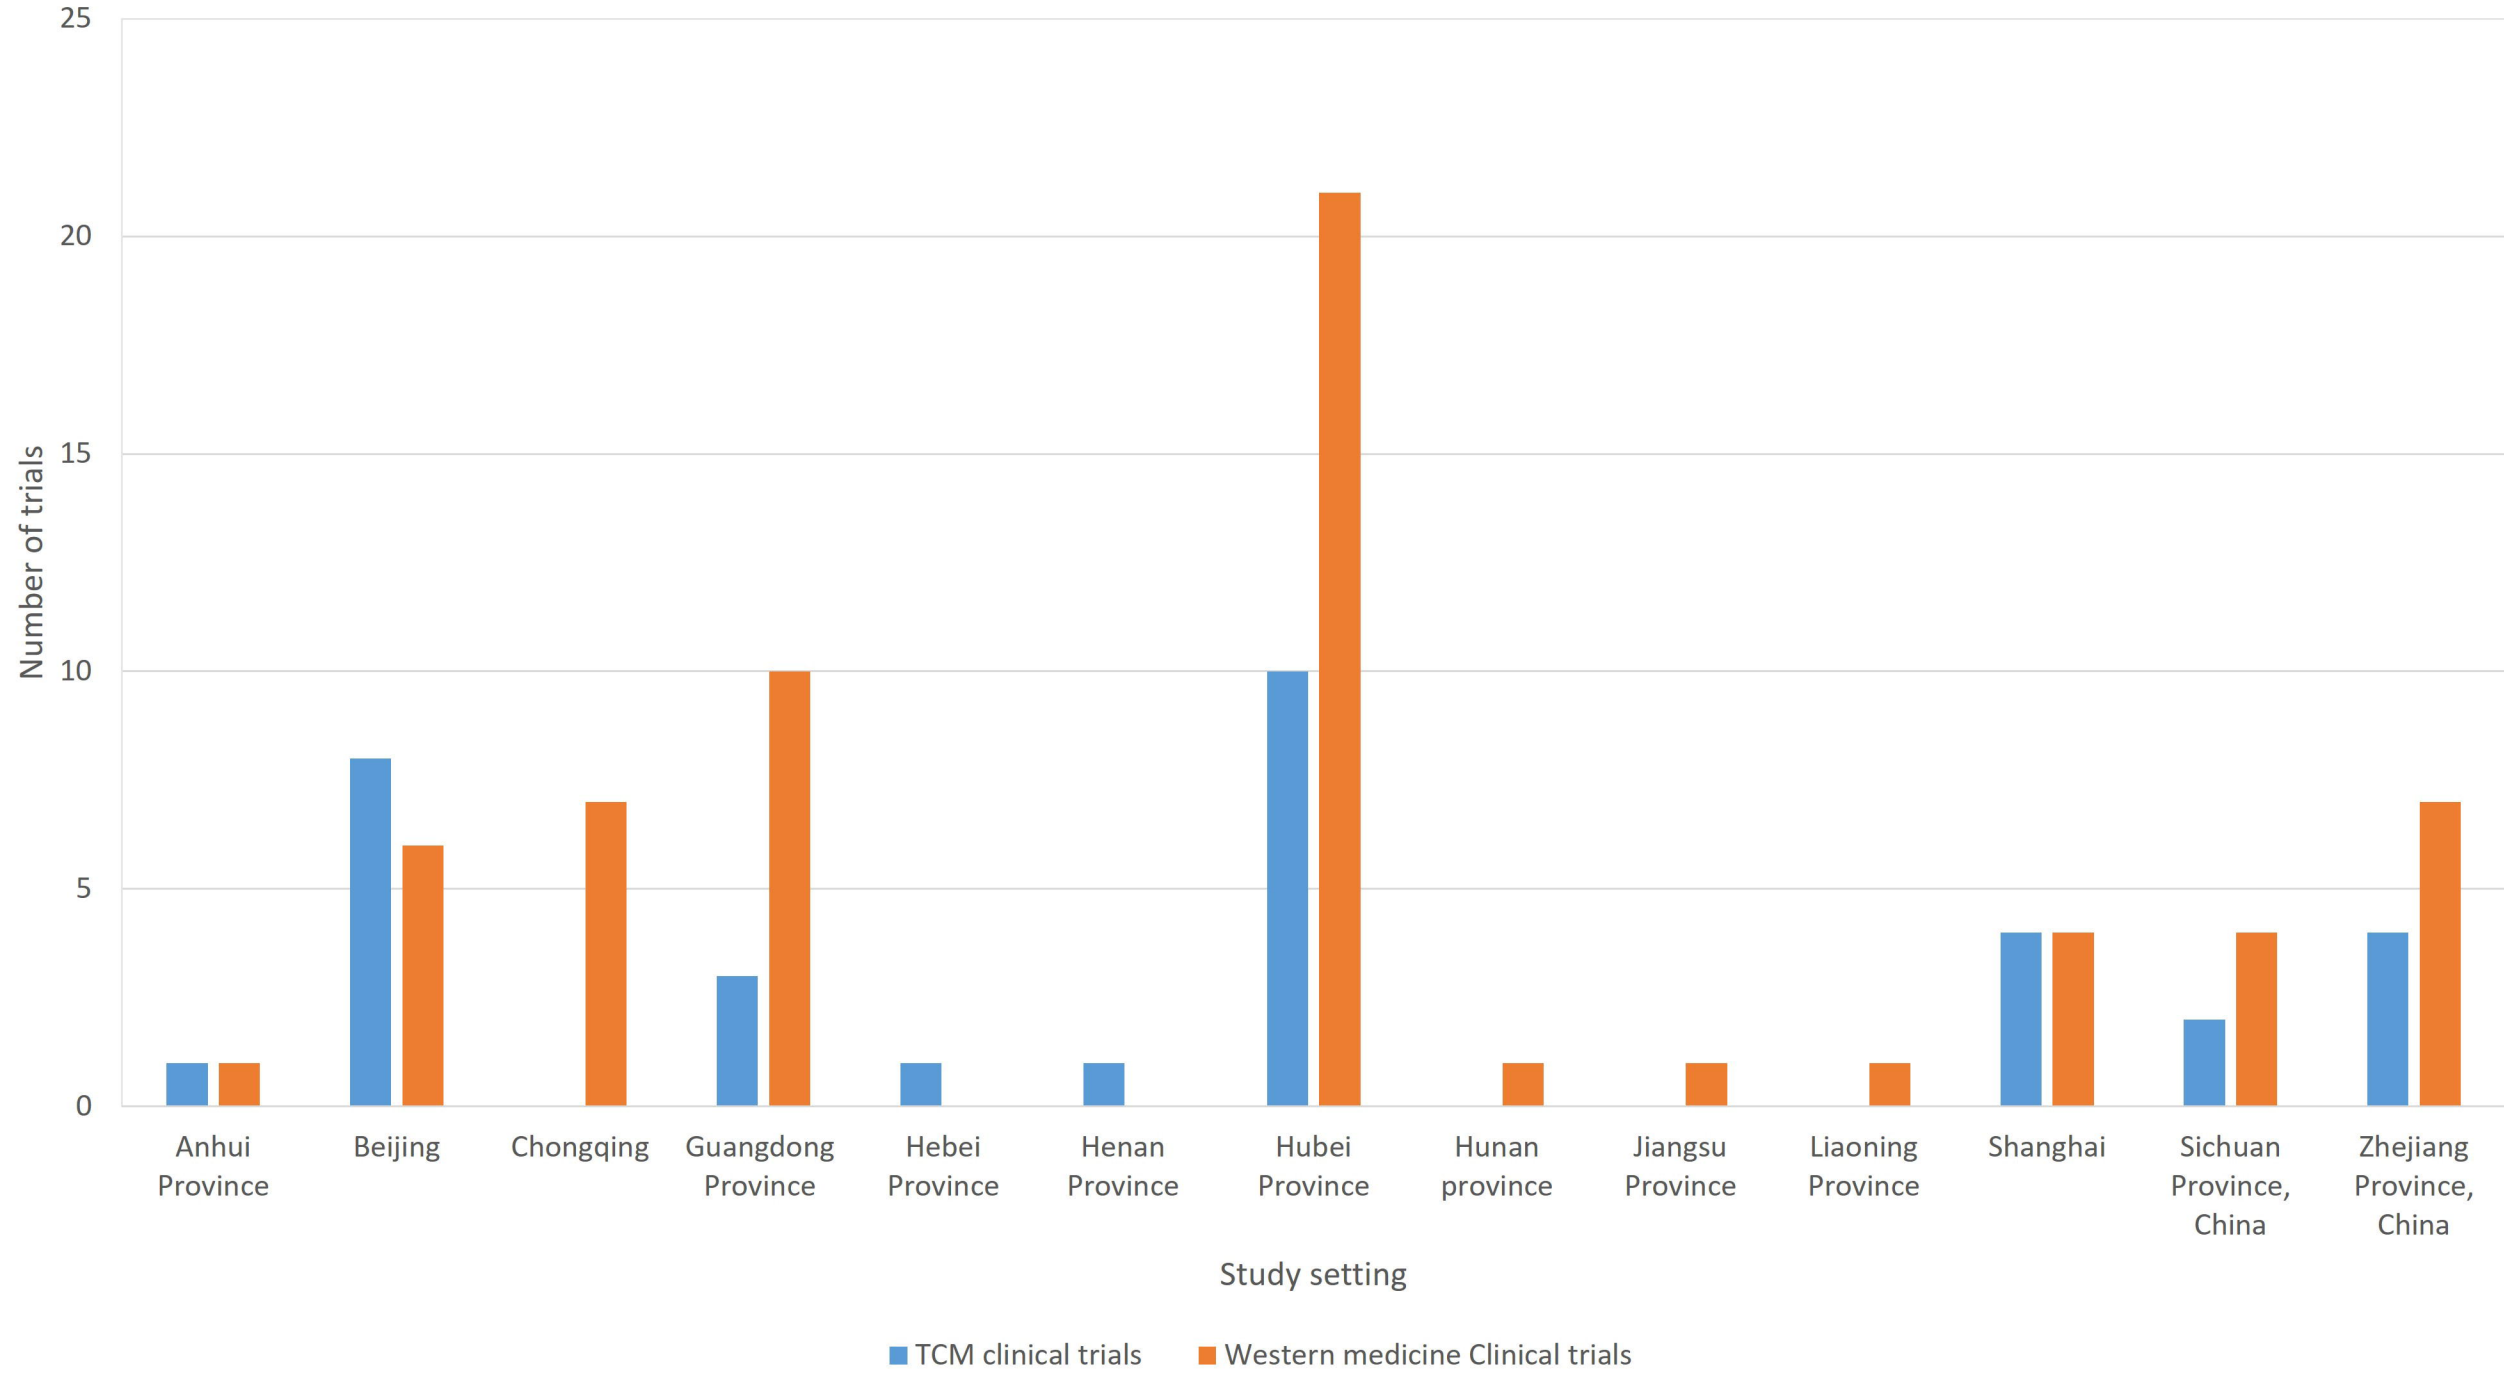

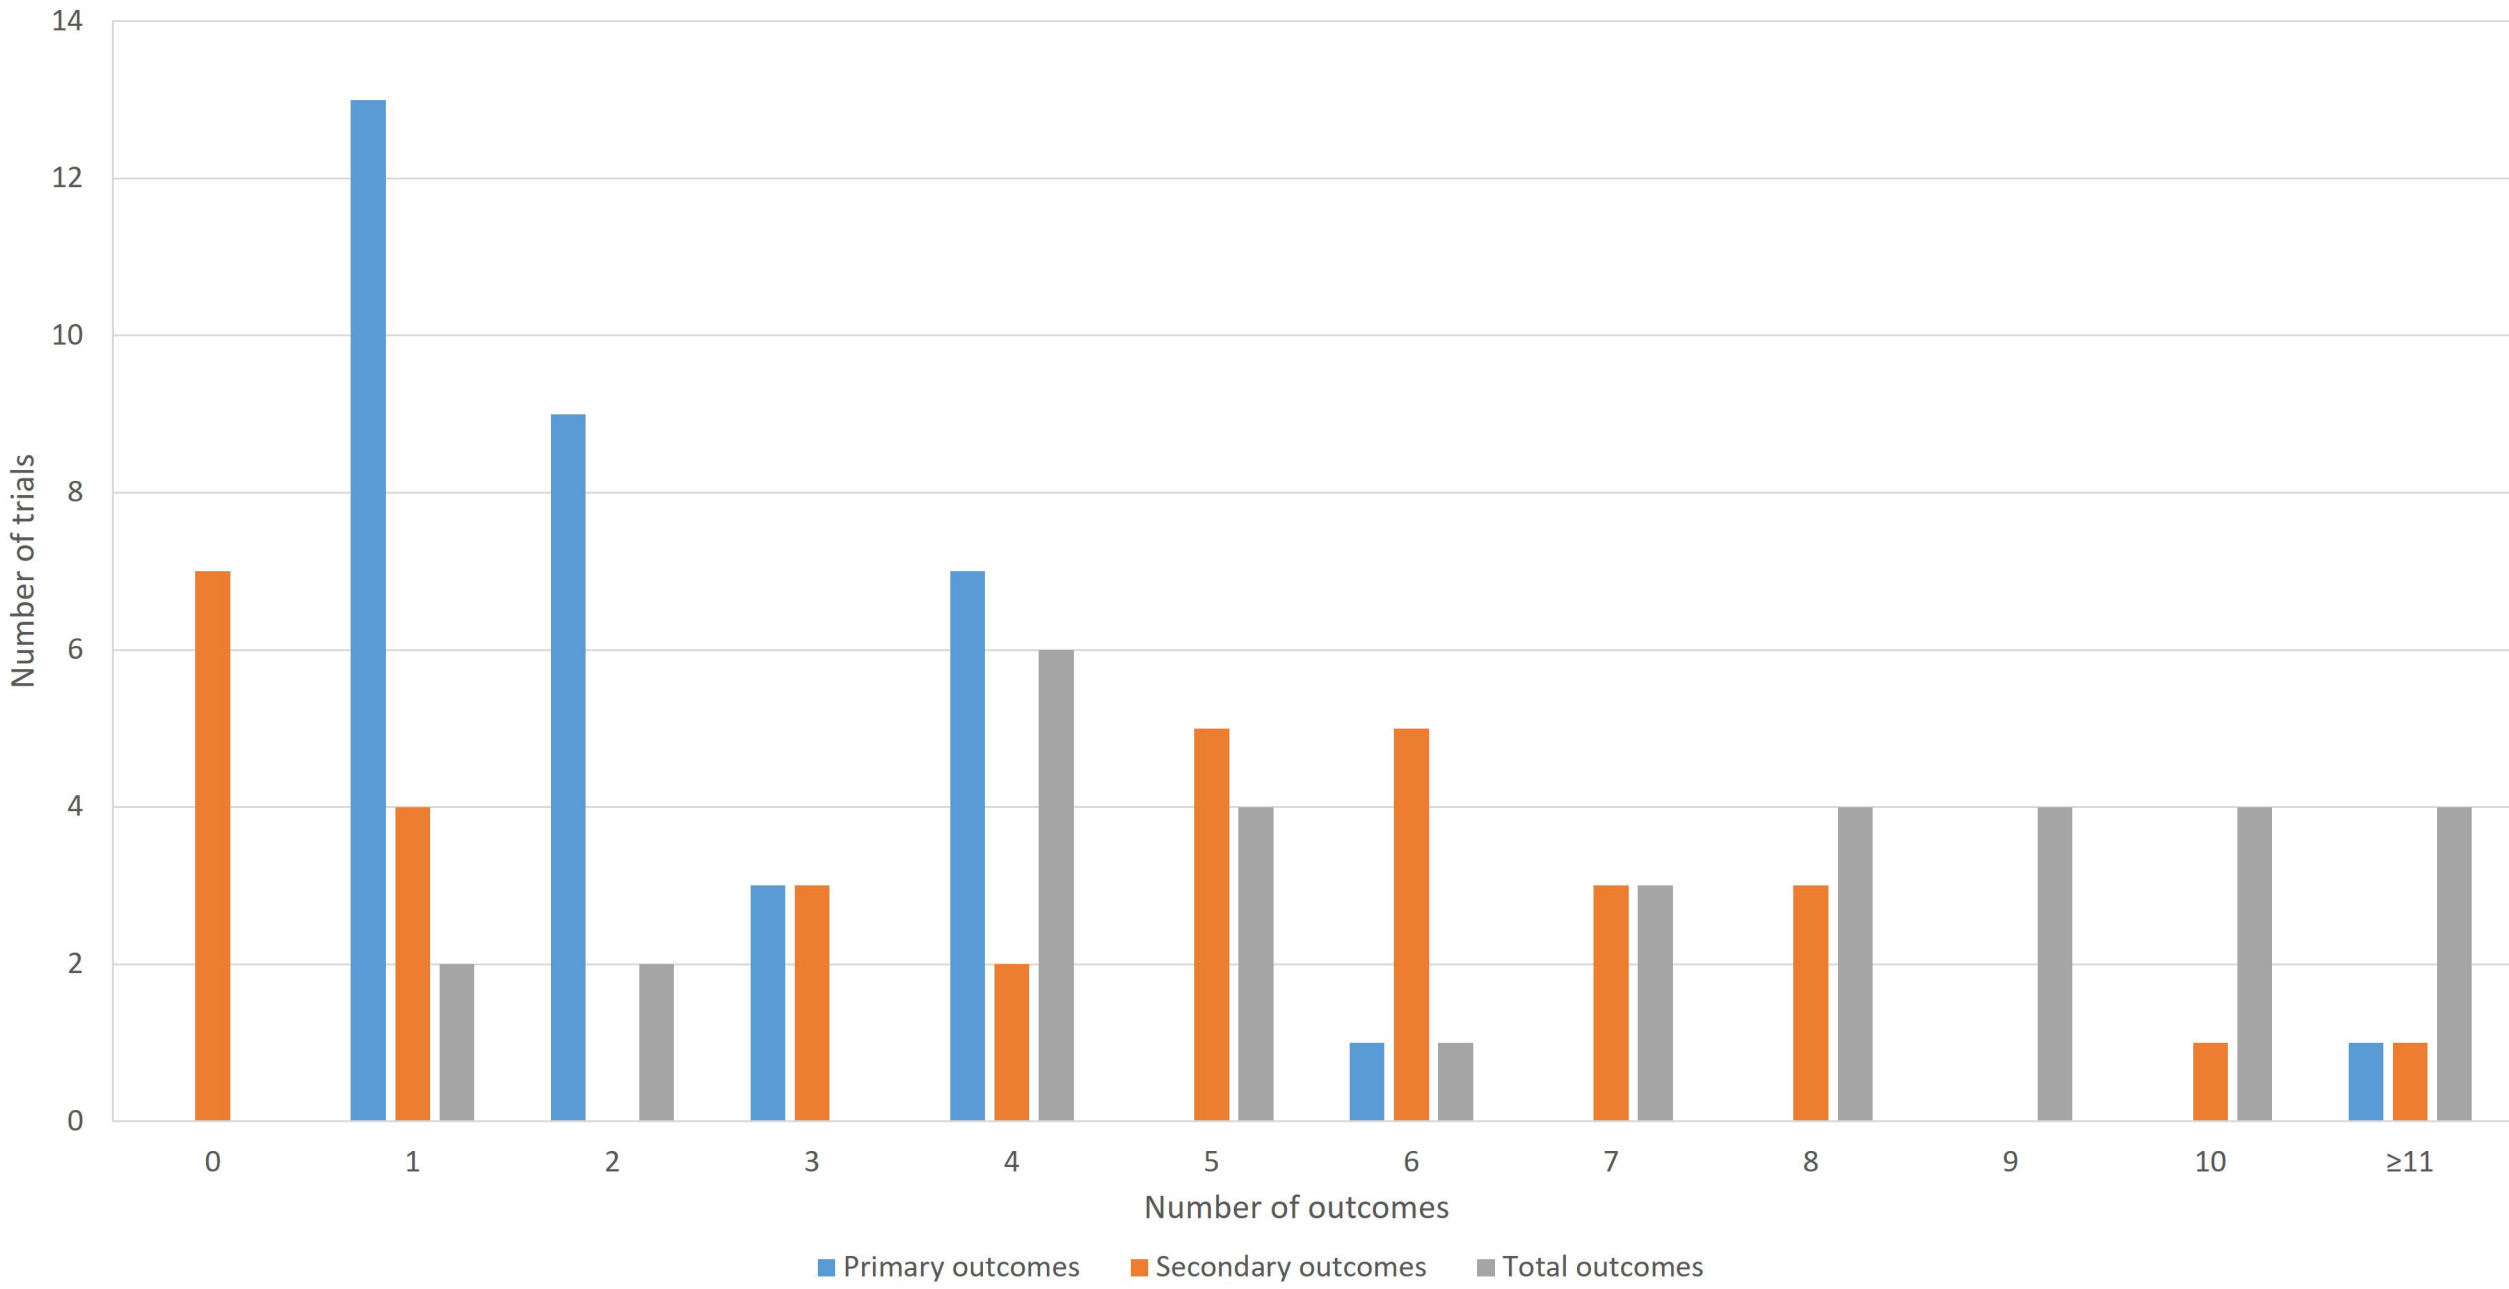

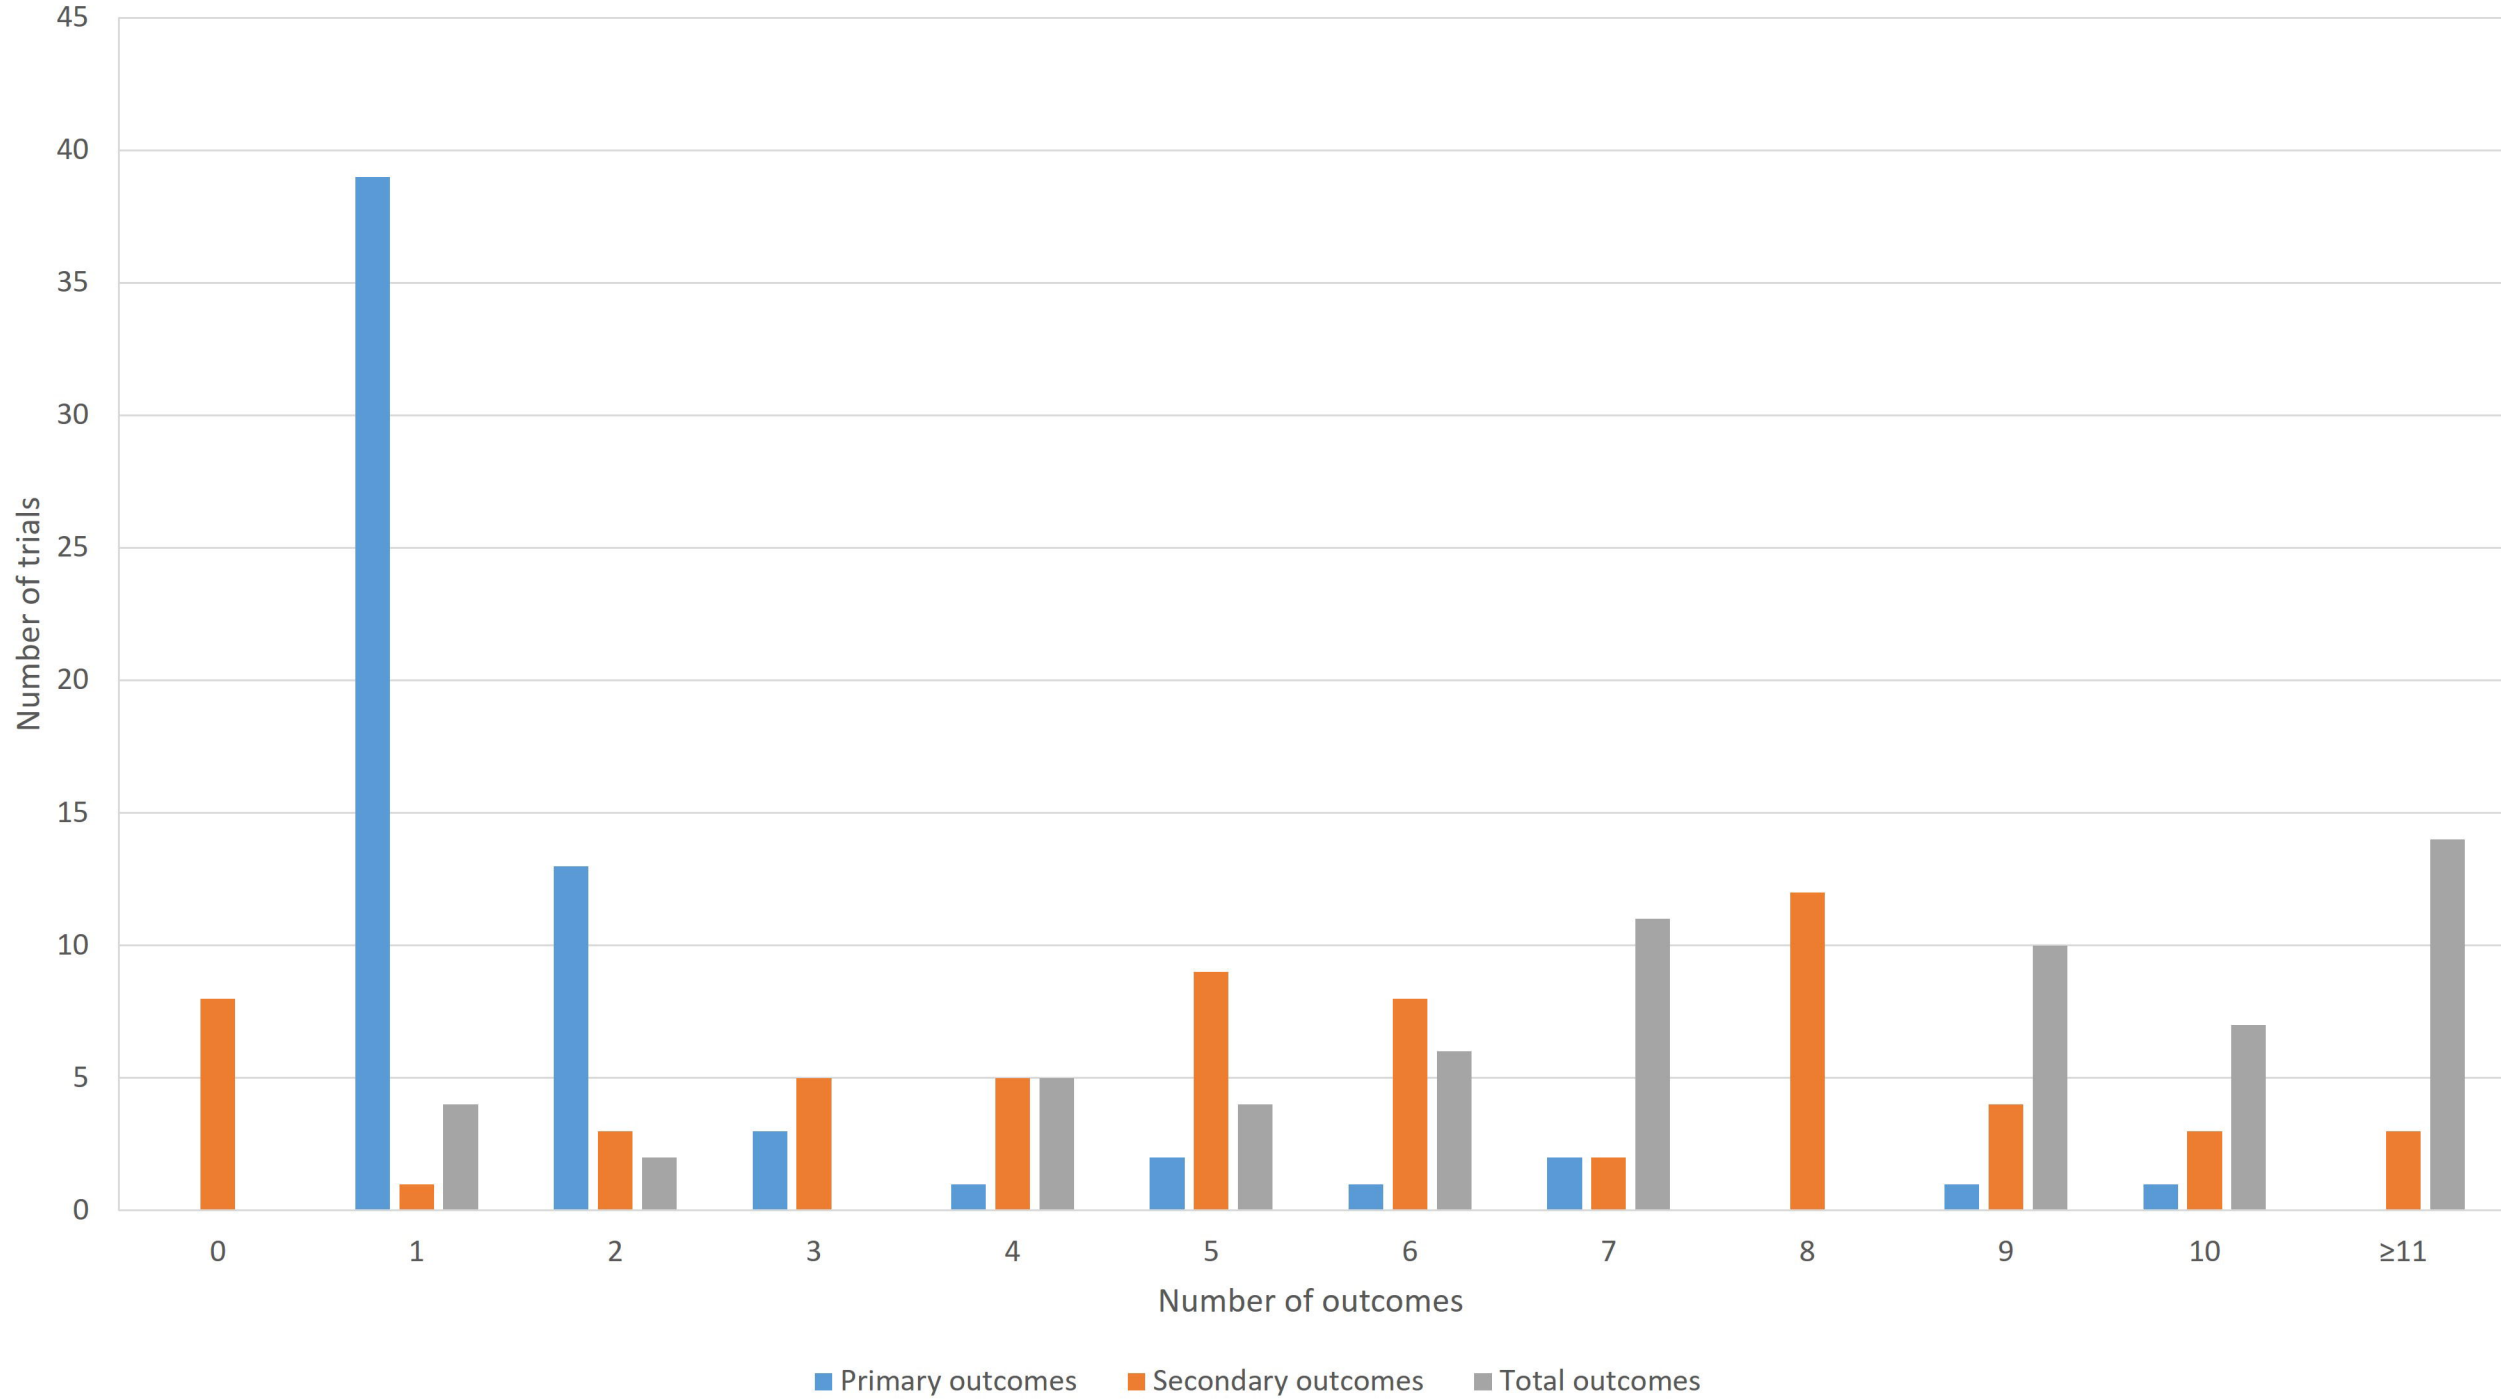

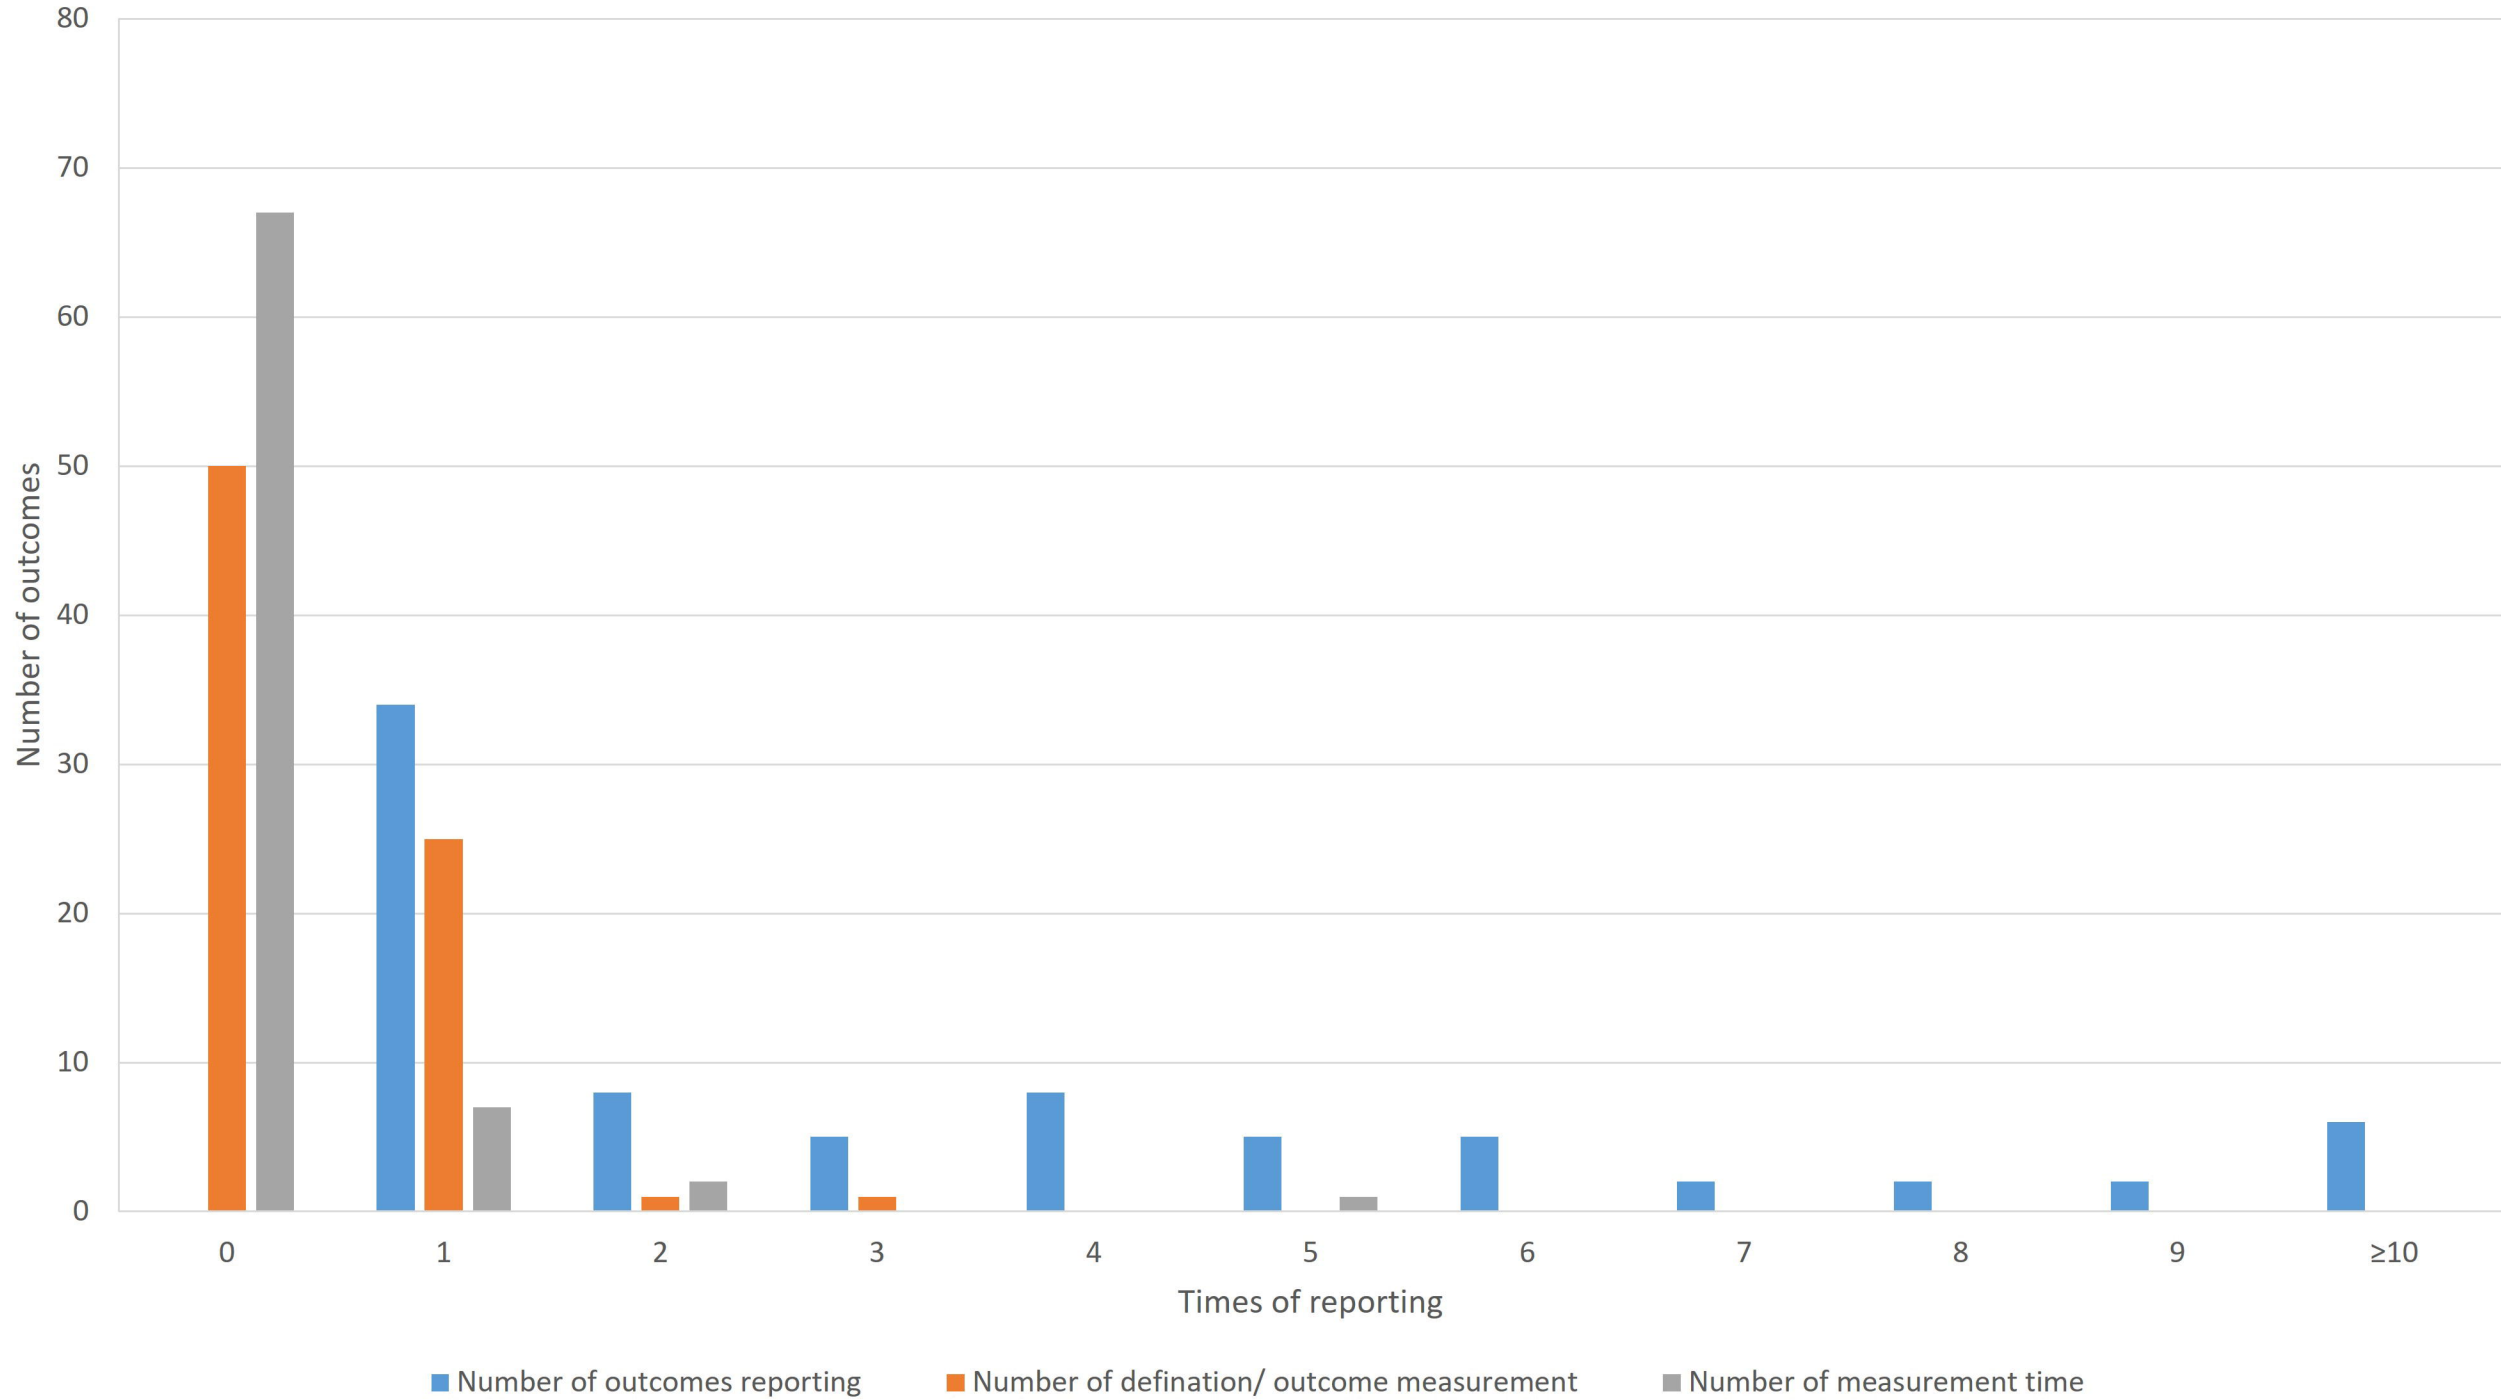

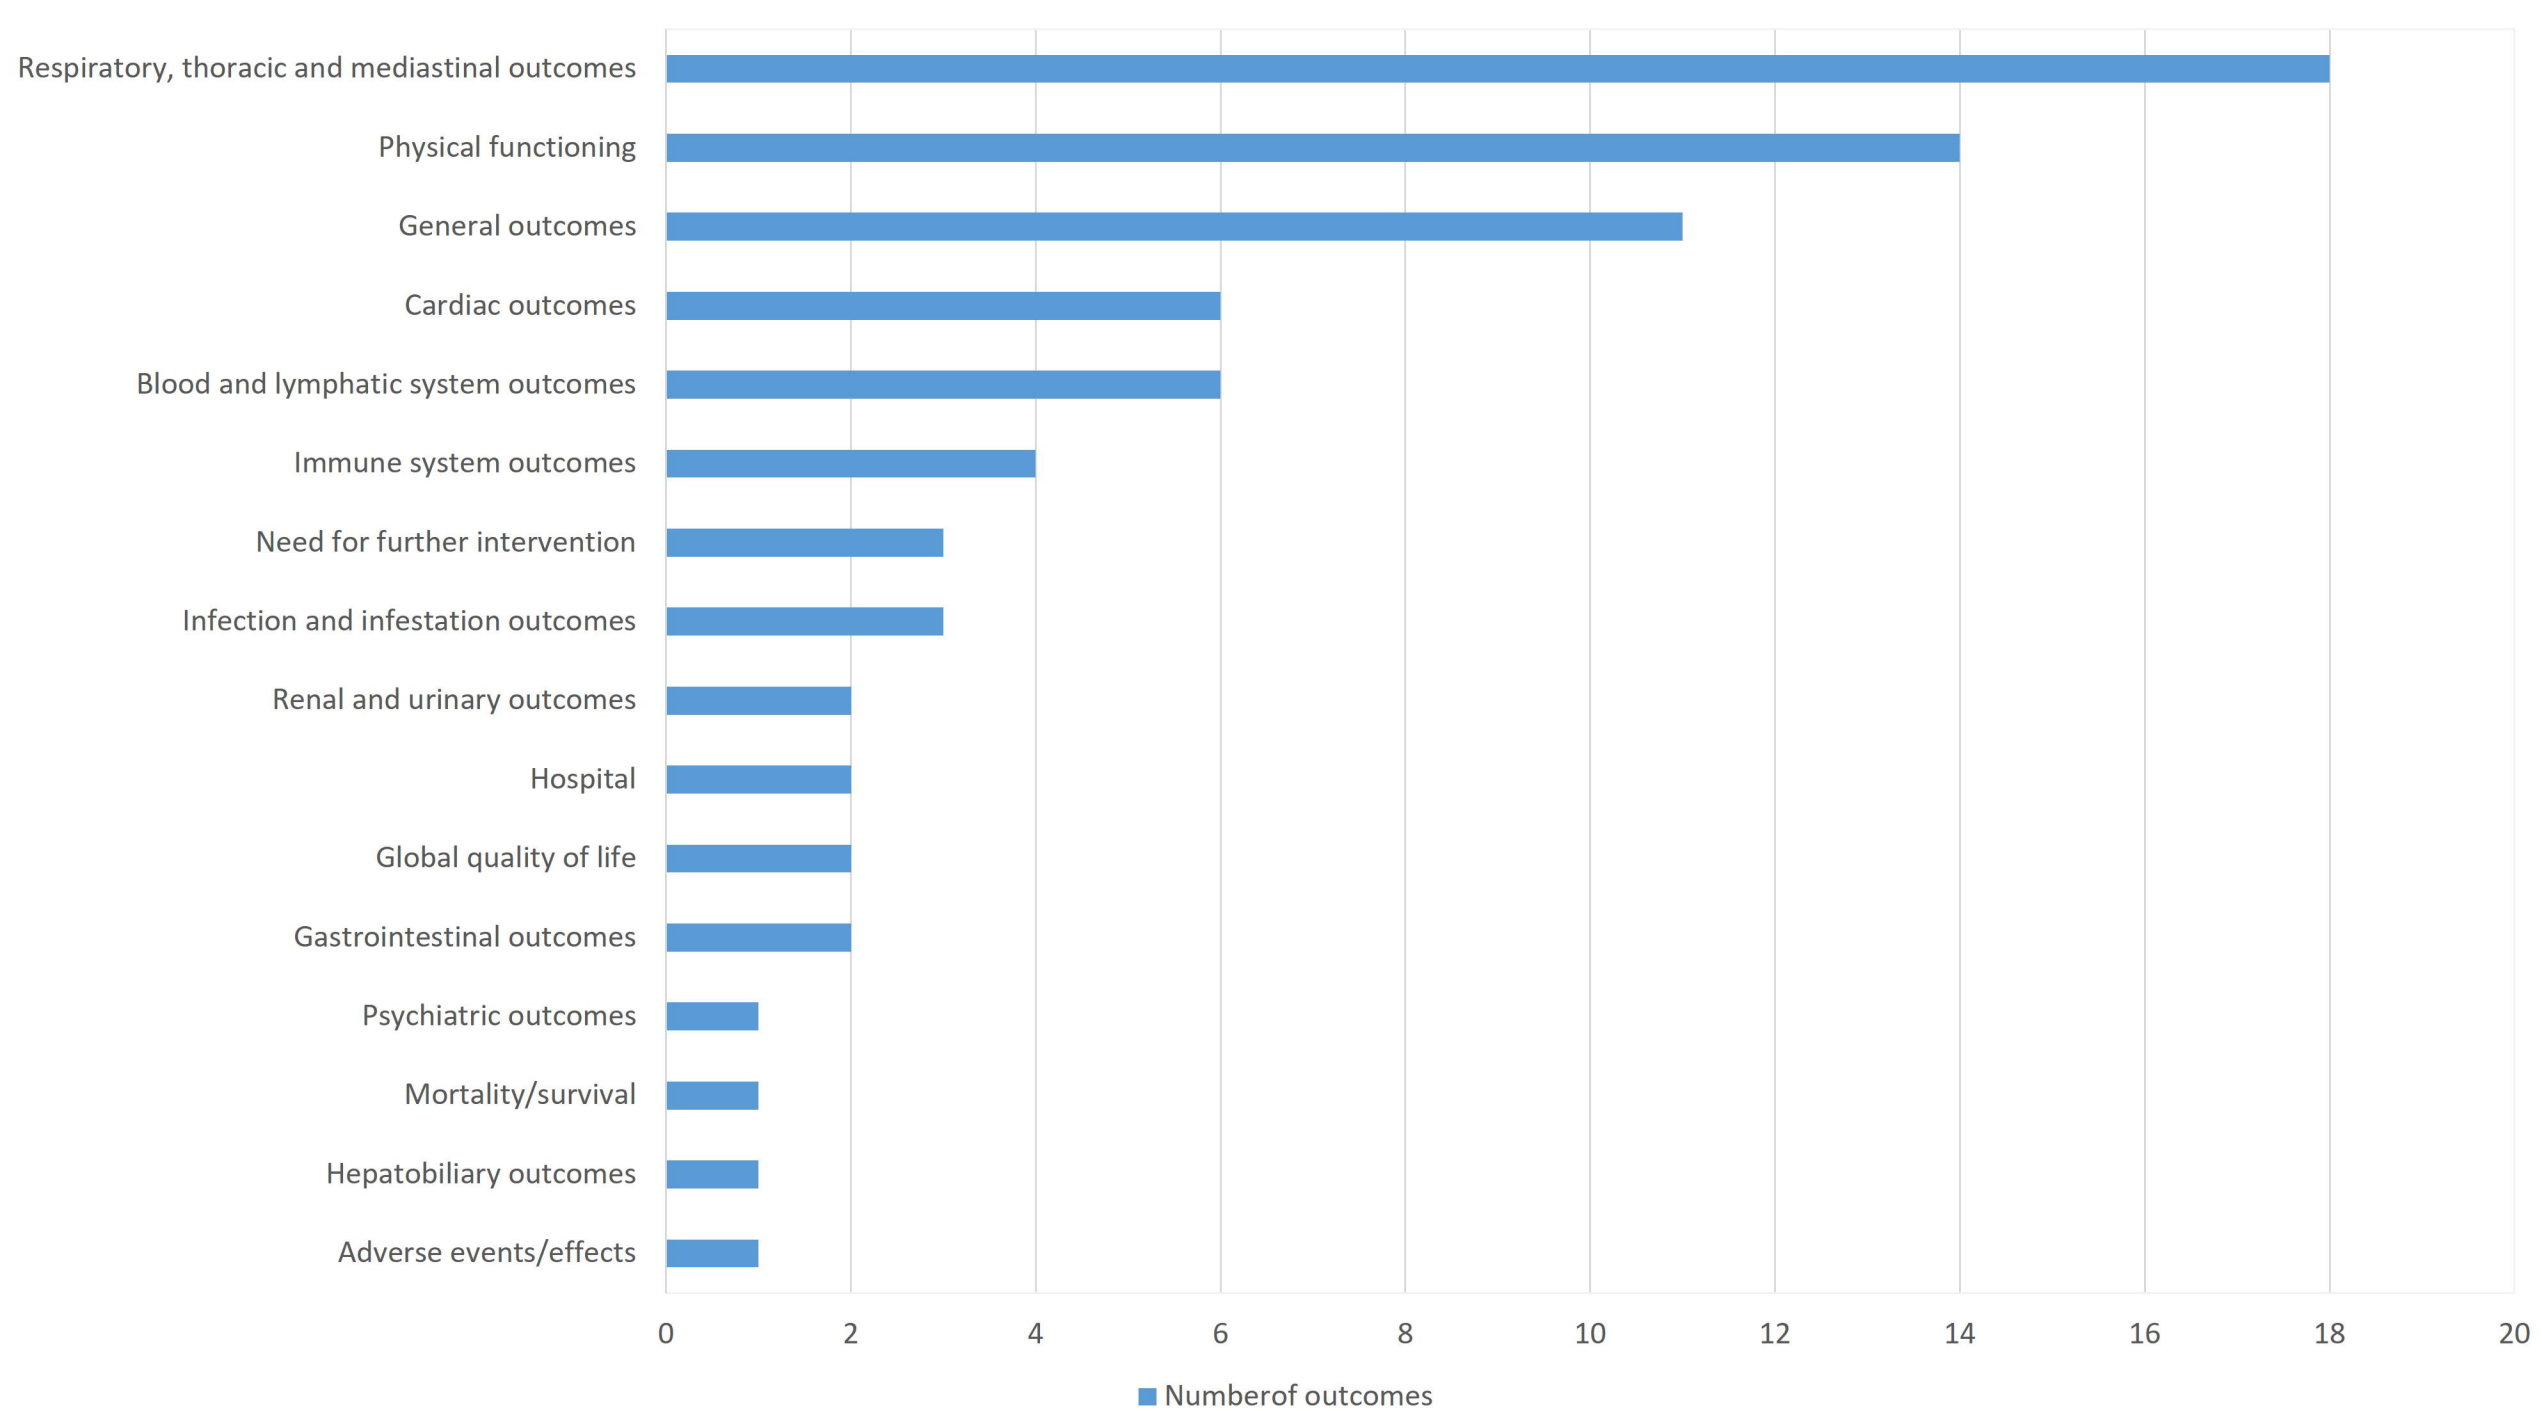

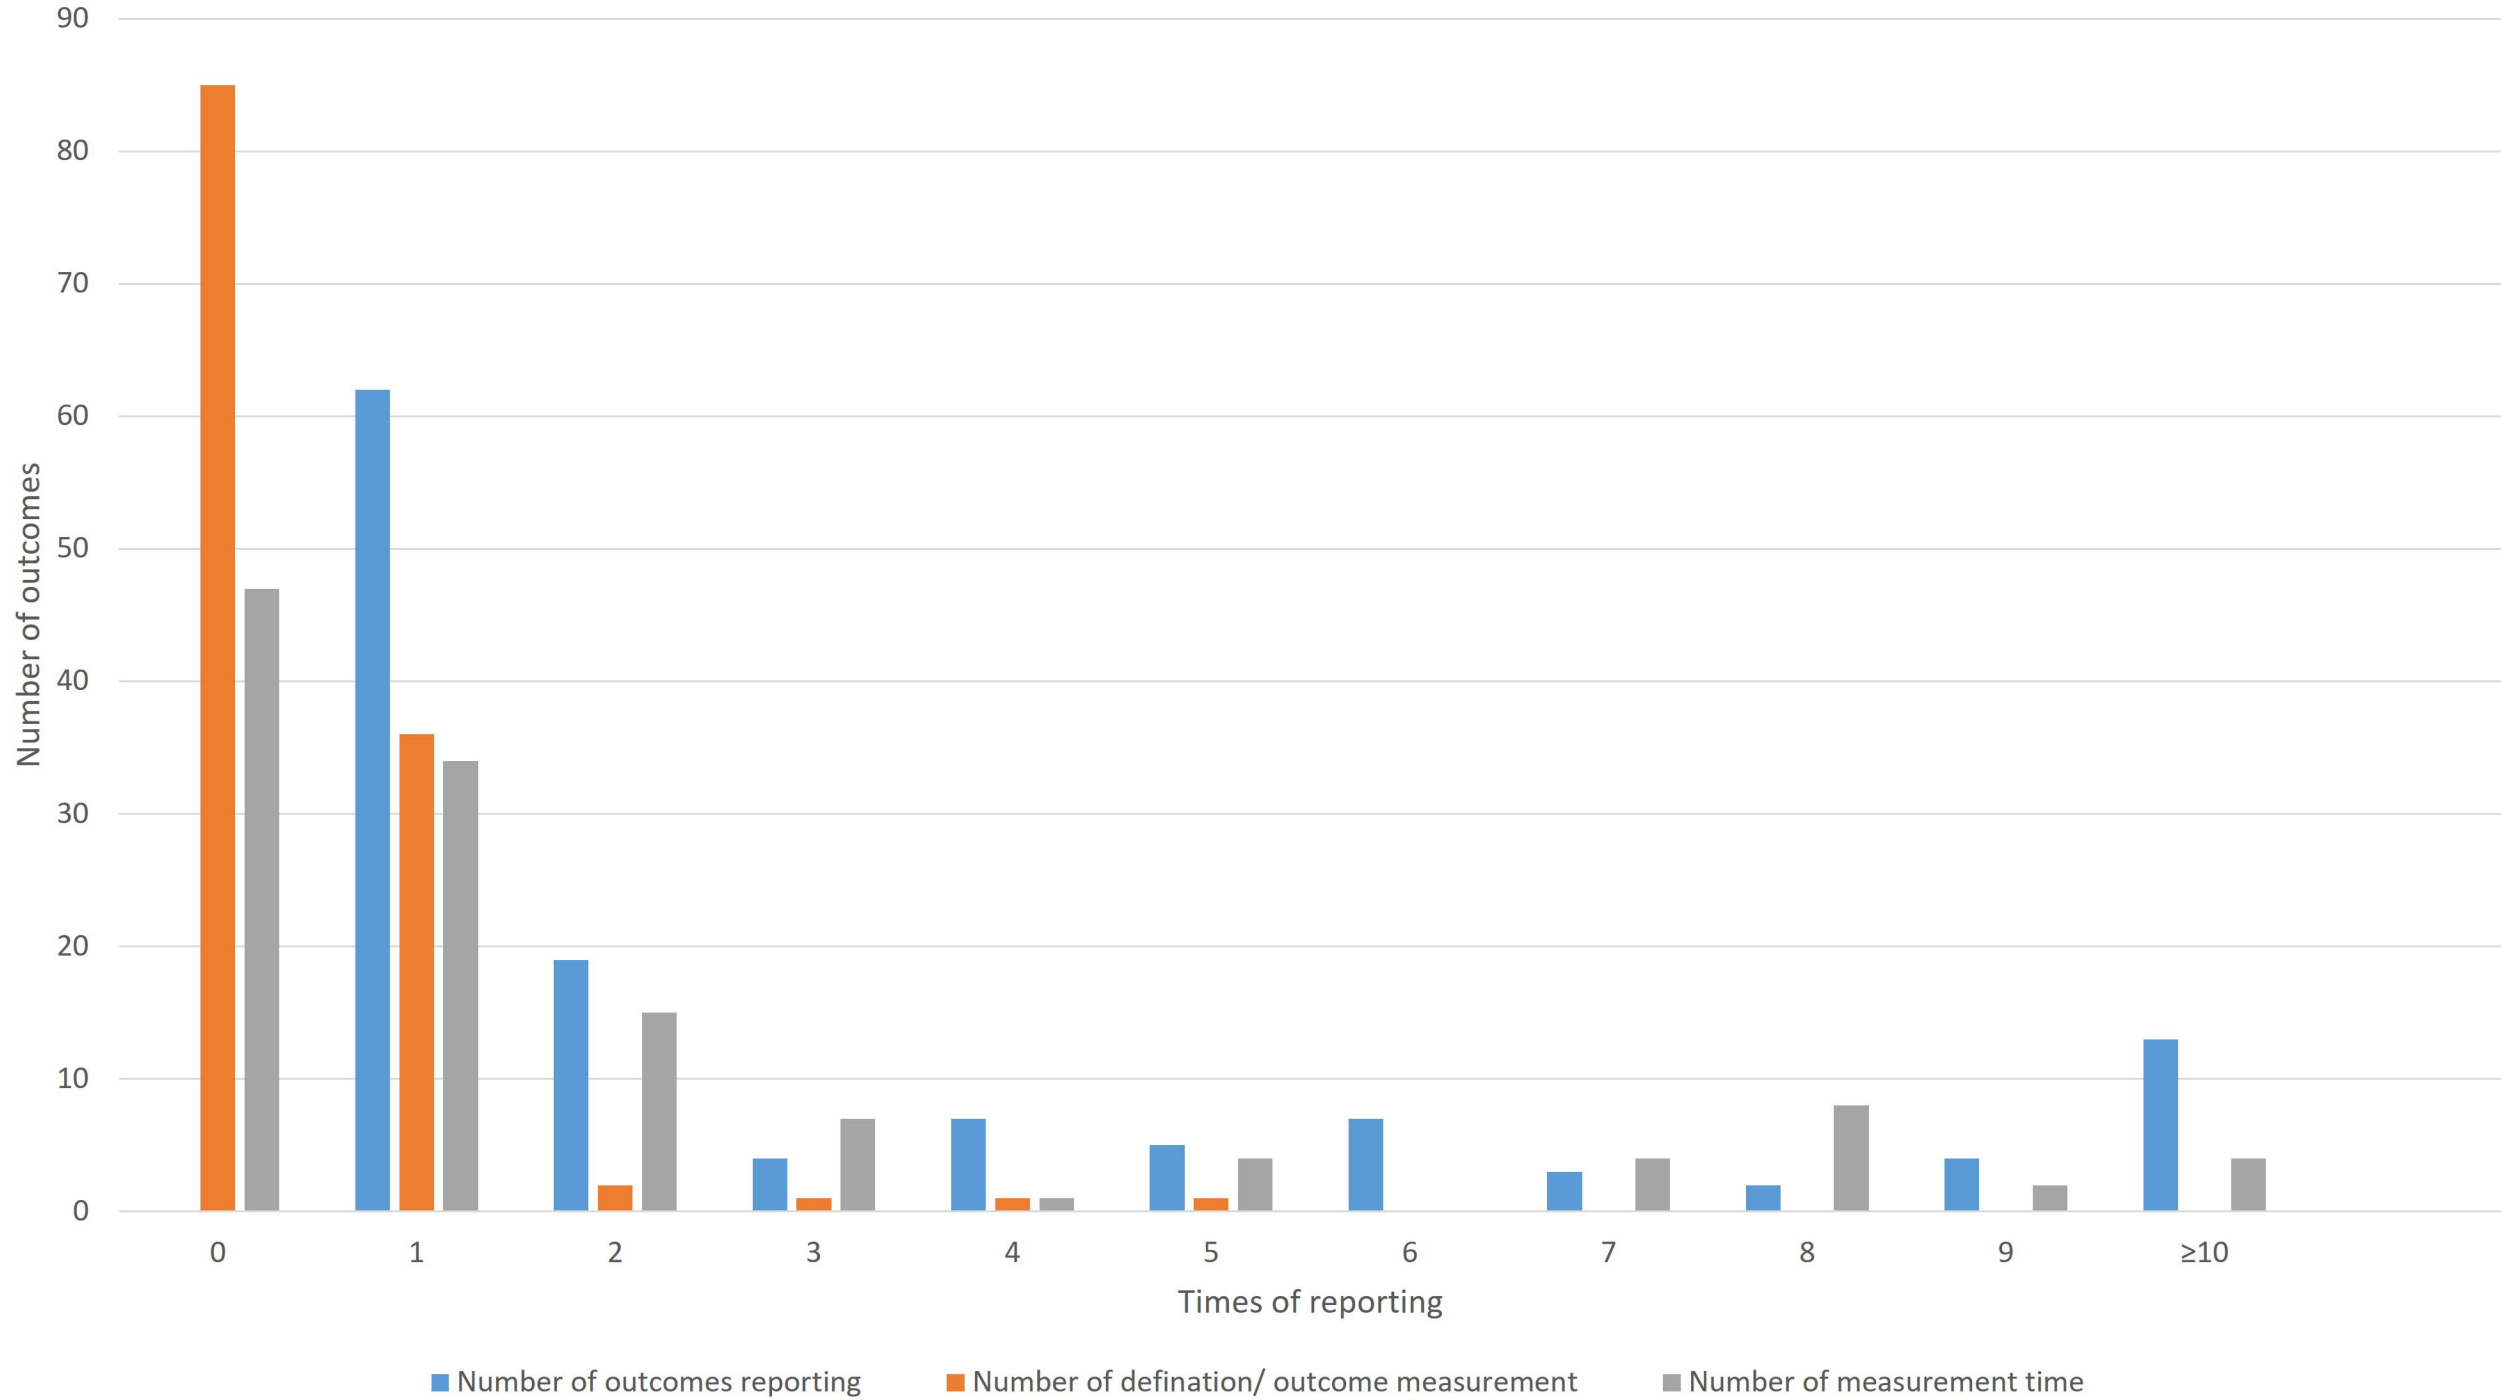



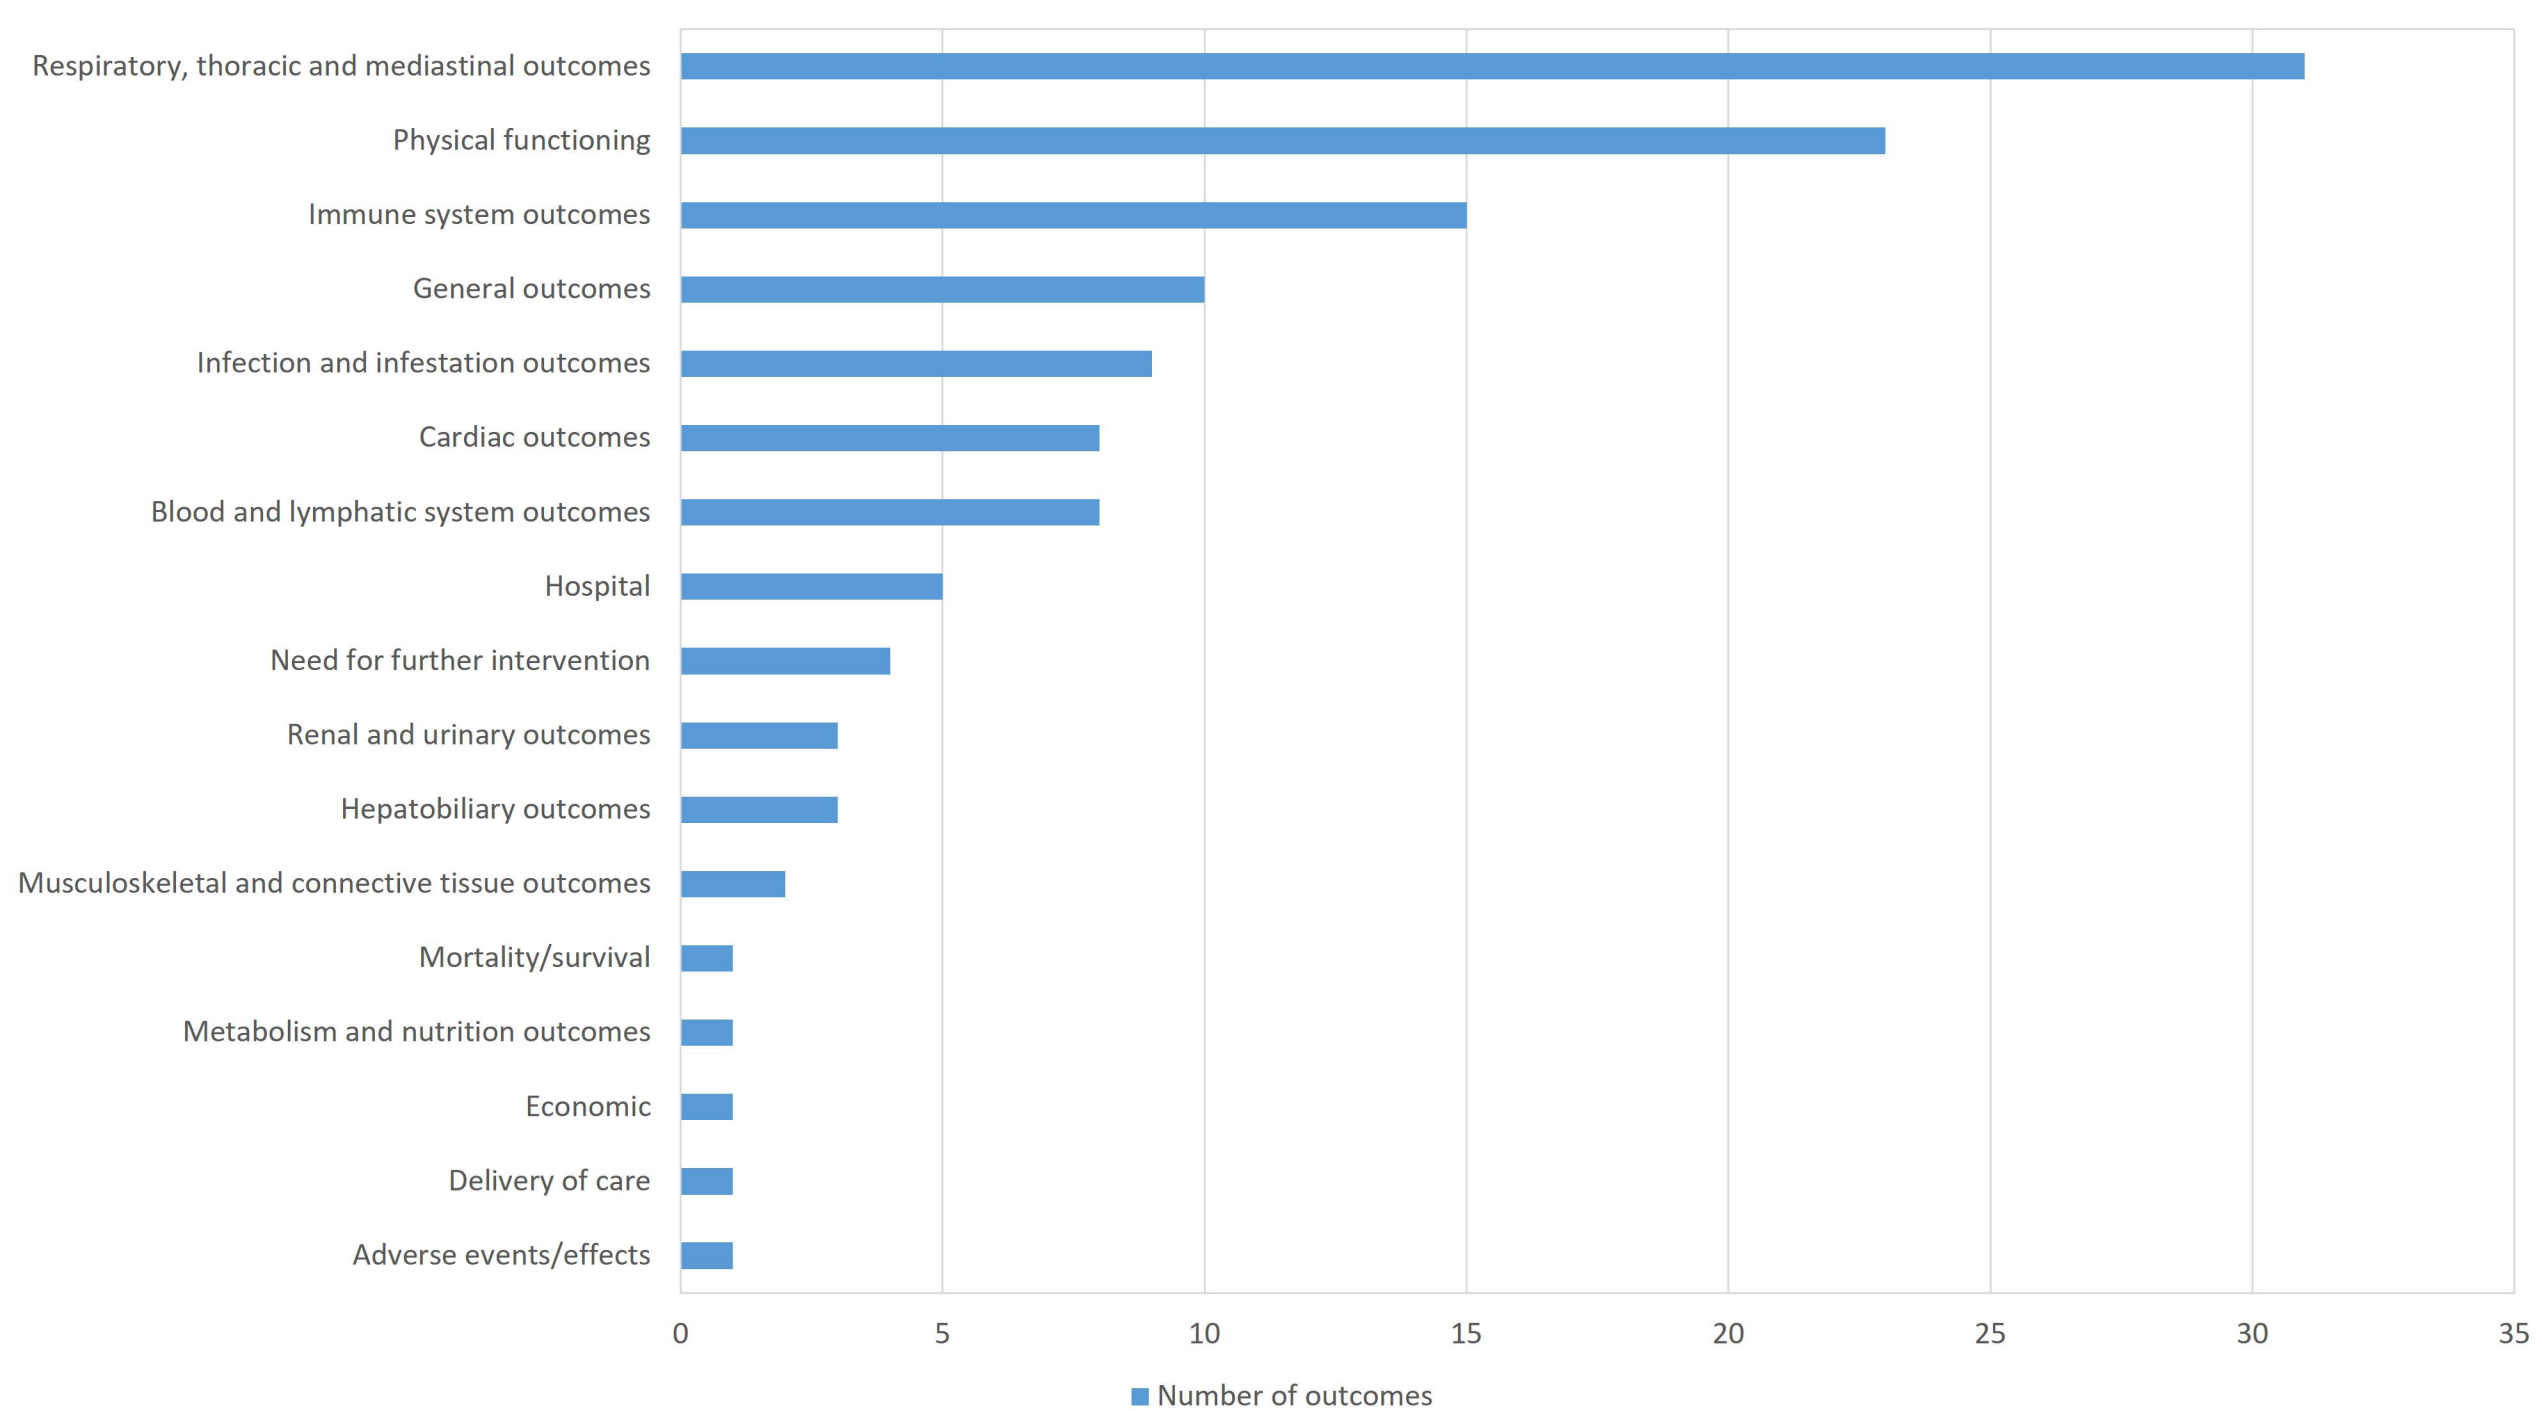

Source: https://medrxiv.org/content/10.1101/2020.03.04.20031401.full.pdf
